# Supplementary material
Source: MDPI journal article supplement (https://www.mdpi.com/search?q=molecules-26-01857)
Supplement: s001 [file molecules-26-01857-s001.pdf]

Supporting Information for

# Direct amination of nitroquinoline derivatives via nucleophilic displacement of an aromatic hydrogen

Jakub Wantulok <sup>1</sup>, Daniel Swoboda <sup>1</sup>, Jacek E. Nycz <sup>1\*</sup>, Maria Książek <sup>2</sup>, Joachim Kusz <sup>2</sup>, Jan Grzegorz Malecki <sup>1</sup> and Vladimír Kubíček <sup>3</sup>

<sup>1</sup> Institute of Chemistry, Faculty of Science and Technology, University of Silesia in Katowice, ul. Szkolna 9; PL-40007 Katowice, Poland; jakub.wantulok1@gmail.com (J.W.); daniel.swoboda@us.edu.pl (D.S.); jan.malecki@us.edu.pl (J.G.M.)

<sup>2</sup> Institute of Physics, Faculty of Science and Technology, University of Silesia in Katowice, 75 Pułku Piechoty 1a, 41-500 Chorzów, Poland; maria.ksiazek@us.edu.pl (M.K.); joachim.kusz@us.edu.pl (J.K.)

<sup>3</sup> Charles University Prague, Faculty of Pharmacy in Hradec Králové, Akademika Heyrovského 1203, 500 05 Hradec Králové, Czech Republic; kubicek@faf.cuni.cz (V.K)

\* Correspondence: jacek.nycz@us.edu.pl; Tel.: +48-32-359-1446 (J.N.)

## *Table of Contents*

|                                                                           |        |
|---------------------------------------------------------------------------|--------|
| Table 1, 2 and 3                                                          | S2-S3  |
| <sup>1</sup> H, <sup>13</sup> C and HMQC; and MS spectra of the compounds | S4-S31 |

**Table S1.** Selected bond lengths (Å) and angles (°) for **4b** and **4c**.

| Bond lengths [Å] |          |                   |          |                   |          |
|------------------|----------|-------------------|----------|-------------------|----------|
| <b>4b</b>        |          | <b>4c</b>         |          |                   |          |
| N2—C8            | 1.473(4) | N12—C15           | 1.464(3) | N22—C25           | 1.467(3) |
| C3—C11           | 1.733(3) | C18—C110          | 1.533(4) | C28—C210          | 1.542(2) |
| N2—O1            | 1.213(4) | N12—O11           | 1.218(3) | N22—O22           | 1.233(3) |
| N2—O2            | 1.208(3) | N12—O12           | 1.228(3) | N22—O21           | 1.213(3) |
| N1—C9            | 1.365(4) | N11—C12           | 1.316(3) | N21—C22           | 1.316(3) |
| N1—C1            | 1.316(4) | N11—C18A          | 1.368(2) | N21—C28A          | 1.371(3) |
| Angles (°)       |          |                   |          |                   |          |
| <b>4b</b>        |          | <b>4c</b>         |          |                   |          |
| N2—C8—C9         | 119.0(2) | N12—C15—<br>C16   | 117.4(2) | N22—C25—<br>C24A  | 121.3(2) |
| N2—C8—C7         | 117.7(3) | C14A—C15—<br>N12  | 121.8(2) | C26—C25—<br>N22   | 116.6(2) |
| C2—C3—C11        | 120.1(3) | C210—C28—<br>C28A | 122.4(2) | C18A—<br>C18—C110 | 122.4(2) |
| C4—C3—C11        | 119.3(2) | C27—C28—<br>C210  | 120.2(2) | C17—C18—<br>C110  | 120.9(2) |
| O2—N2—O1         | 123.7(3) | O12—N12—<br>O11   | 123.5(2) | O21—N22—<br>O22   | 123.5(2) |

**Table S2.** Selected bond lengths (Å) and angles (°) for **5a**.

| Bond lengths [Å] |          |                |          |               |          |
|------------------|----------|----------------|----------|---------------|----------|
| <b>5a</b>        |          |                |          |               |          |
| N120—C117        | 1.466(4) | N220—C217      | 1.472(5) | N320—C317     | 1.464(6) |
| N316—C318        | 1.362(5) | N316—C315      | 1.318(5) | N39—C310      | 1.419(4) |
| N216—C215        | 1.317(5) | N216—C219      | 1.359(4) | N29—C210      | 1.414(4) |
| N116—C115        | 1.323(6) | N116—C118      | 1.362(4) | N19—C110      | 1.423(5) |
| Angles (°)       |          |                |          |               |          |
| <b>5a</b>        |          |                |          |               |          |
| C118—C117—N120   | 118.5(3) | C110—C117—N120 | 119.3(3) | C110—N19—C19A | 126.8(3) |
| C210—C217—N220   | 120.4(3) | C219—C217—N220 | 116.6(3) | C110—N19—C18A | 124.6(3) |
| C310—C317—N320   | 119.7(3) | C210—N29—C28A  | 124.1(3) | C210—N29—C29B | 124.2(3) |
| C318—C317—N320   | 117.3(3) | C310—N39—C39B  | 126.4(3) | C310—N39—C38A | 123.4(3) |

**Table S3.** Selected bond lengths (Å) and angles (°) for **5b**.

| Bond lengths [Å] |          |                |          |               |          |
|------------------|----------|----------------|----------|---------------|----------|
| <b>5b</b>        |          |                |          |               |          |
| C110–N19         | 1.416(4) | C210–N29       | 1.413(4) |               |          |
| N120–O11         | 1.355(4) | N220–O21       | 1.365(4) |               |          |
| C117–N120        | 1.304(4) | C217–N220      | 1.297(4) |               |          |
| C112–O12         | 1.228(4) | C212–O22       | 1.219(4) |               |          |
| Angles (°)       |          |                |          |               |          |
| <b>5b</b>        |          |                |          |               |          |
| N120–C117–C110   | 115.2(3) | C218–C217–N220 | 127.2(3) | C110–N19–C19A | 124.7(2) |
| C118–C117–N120   | 127.3(3) | C210–C217–N220 | 115.4(3) | C110–N19–C18A | 126.3(2) |
| C119–C112–O12    | 121.1(3) | O22–C212–C211  | 122.2(3) | C210–N29–C28A | 126.2(2) |
| C111–C112–O12    | 121.2(3) | O22–C212–C219  | 120.9(3) | C210–N29–C29A | 125.6(2) |

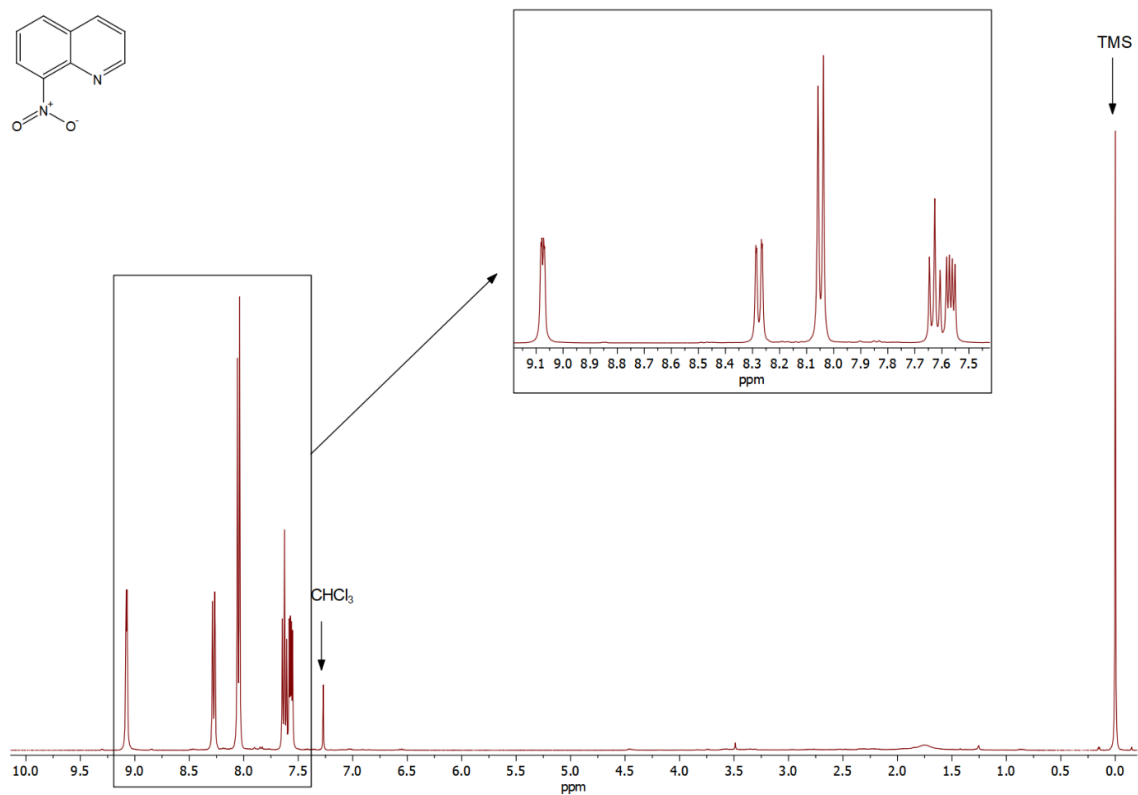

Figure S1a.  $^1\text{H-NMR}$  ( $\text{CDCl}_3$ ; 400.2 MHz) spectrum of the **4a**.

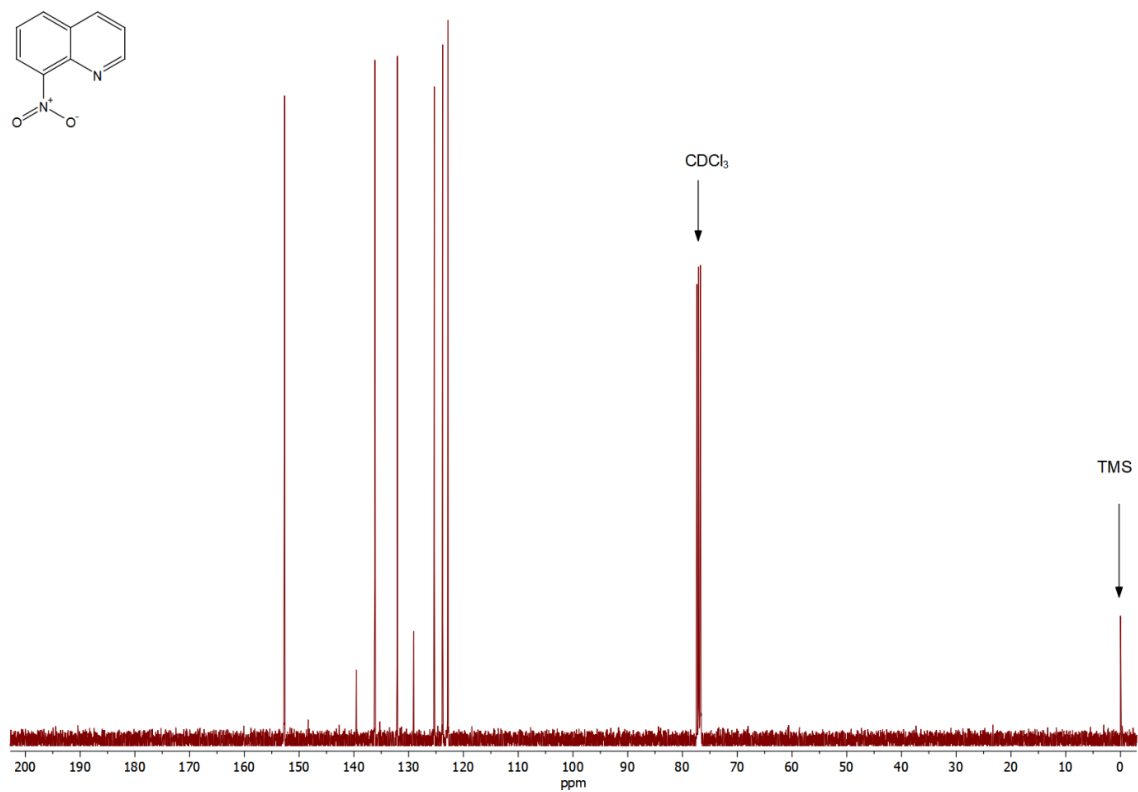

Fig. S1b.  $^{13}\text{C}\{^1\text{H}\}$  NMR ( $\text{CDCl}_3$ ; 100.6 MHz) spectrum of the **4a**.

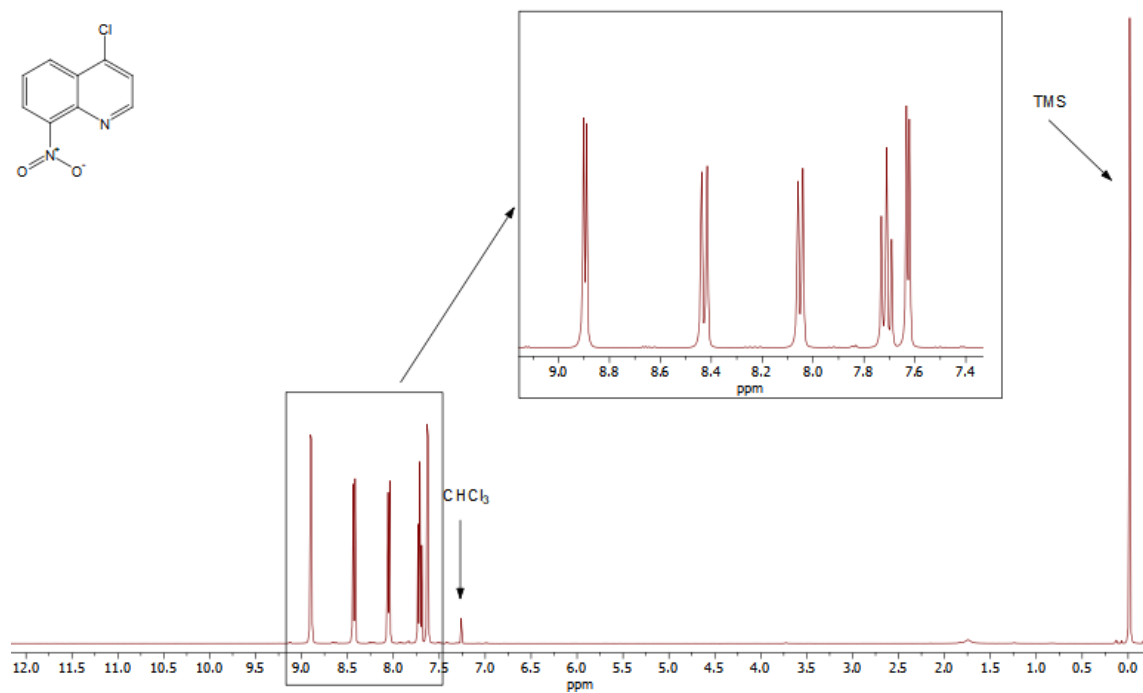

**Fig. S2a.**  $^1\text{H}$  NMR ( $\text{CDCl}_3$ ; 400.2 MHz) spectrum of the **4b**.

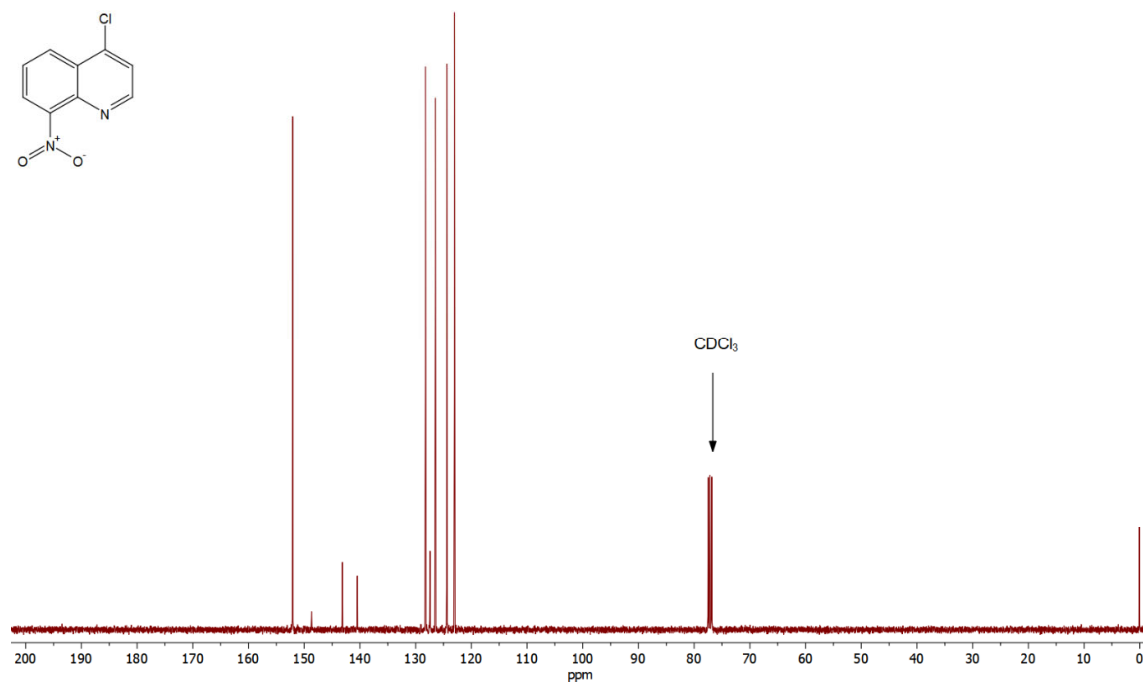

**Fig. S2b.**  $^{13}\text{C}\{^1\text{H}\}$  NMR ( $\text{CDCl}_3$ ; 100.6 MHz) spectrum of the **4b**.

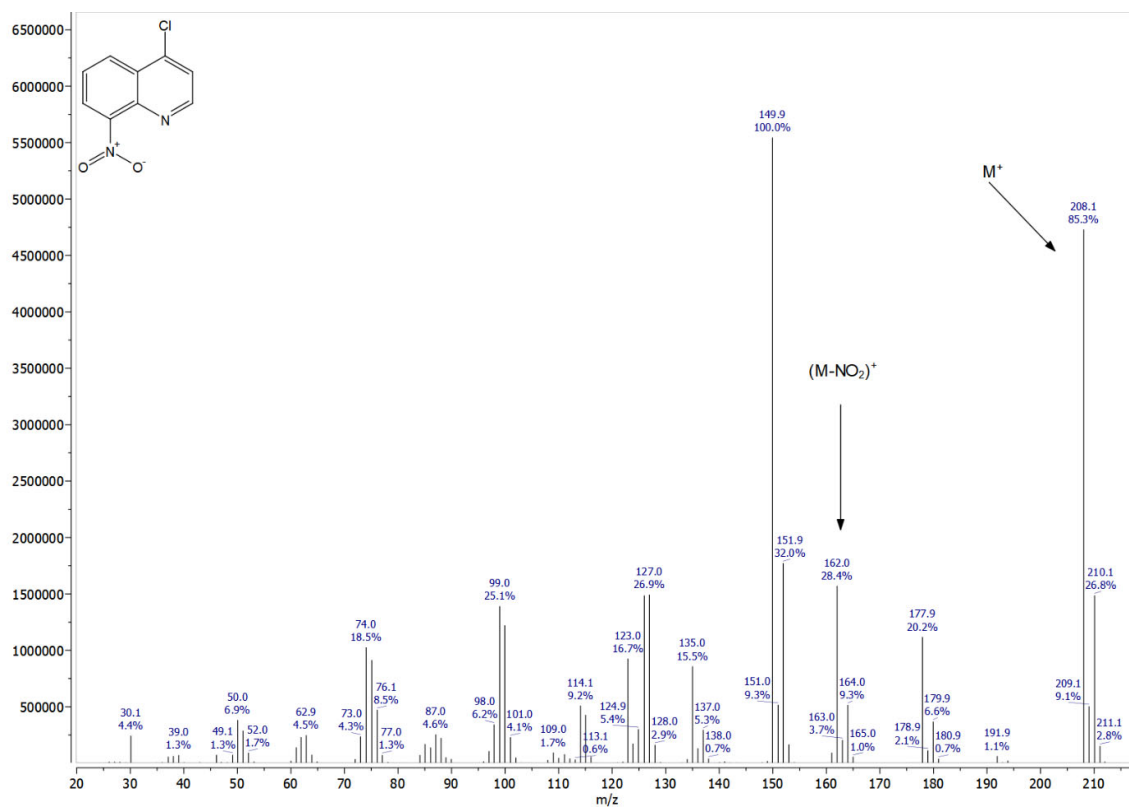

Fig. S2c. MS spectrum of the 4b.

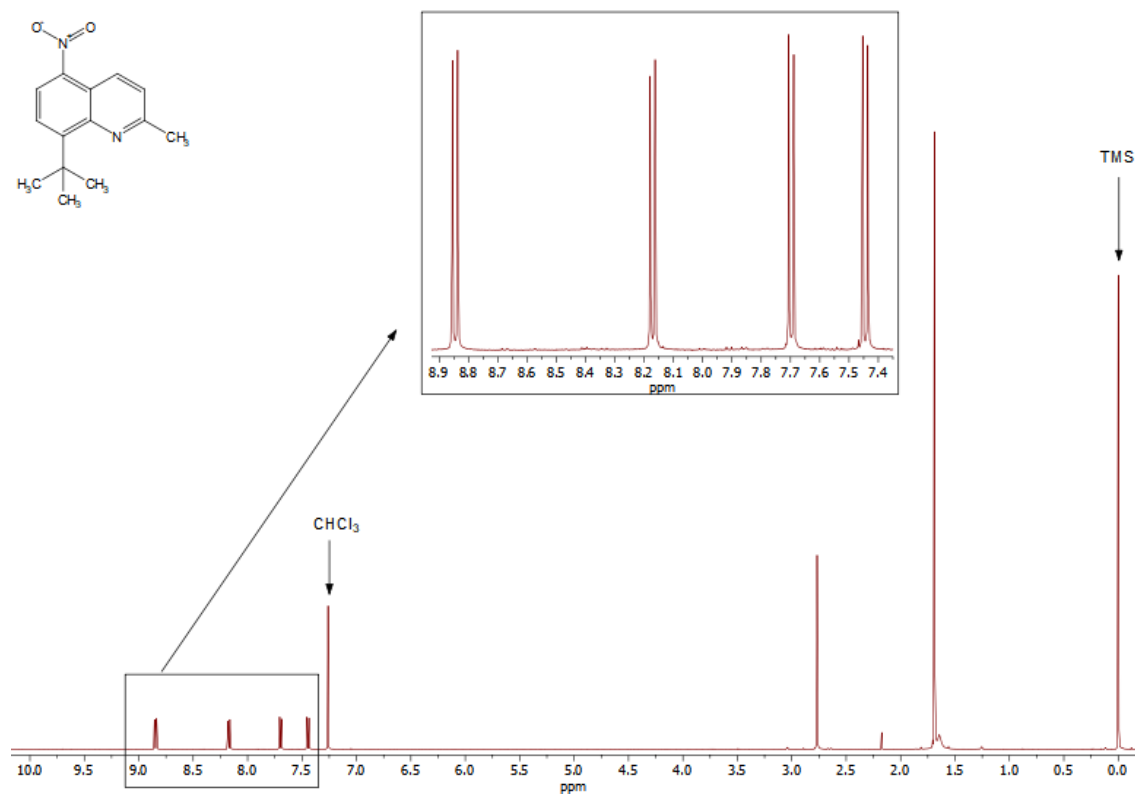

**Fig. S3a.**  $^1\text{H NMR}$  (CDCl<sub>3</sub>; 500.2 MHz) spectrum of the 4c.

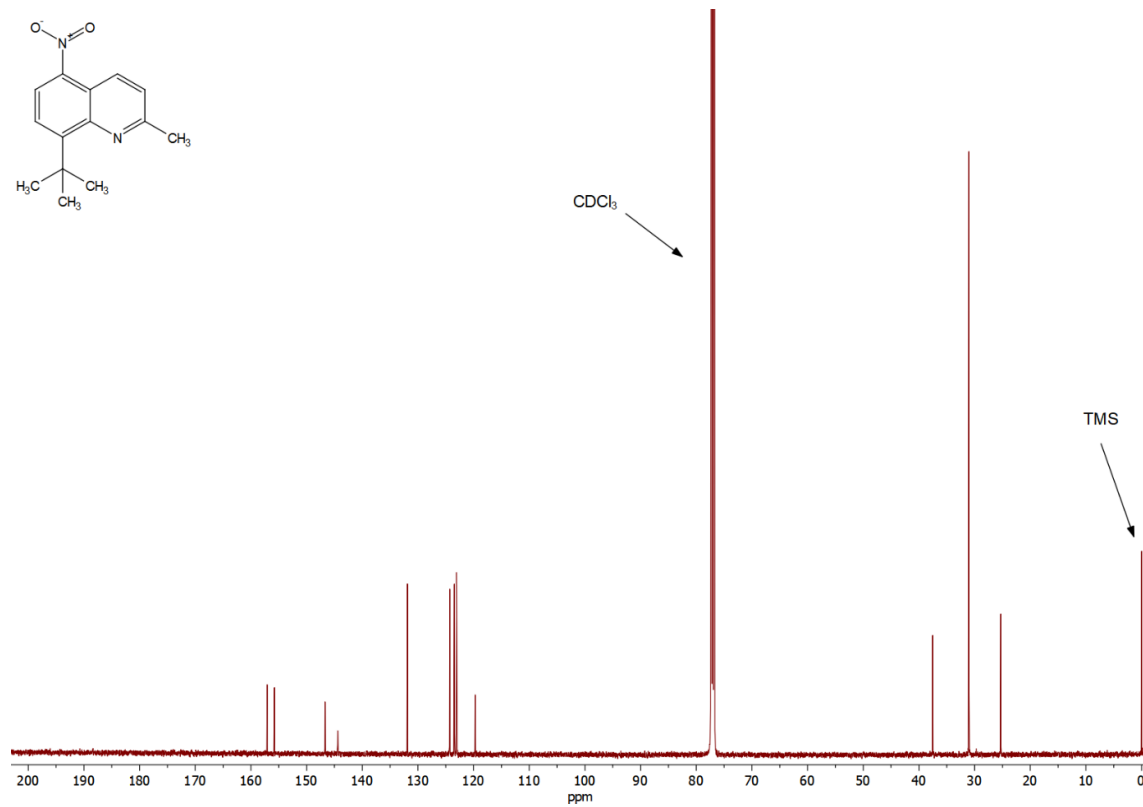

**Fig. S3b.**  $^{13}\text{C}\{^1\text{H}\}$  NMR (CDCl<sub>3</sub>; 125.8 MHz) spectrum of the 4c.

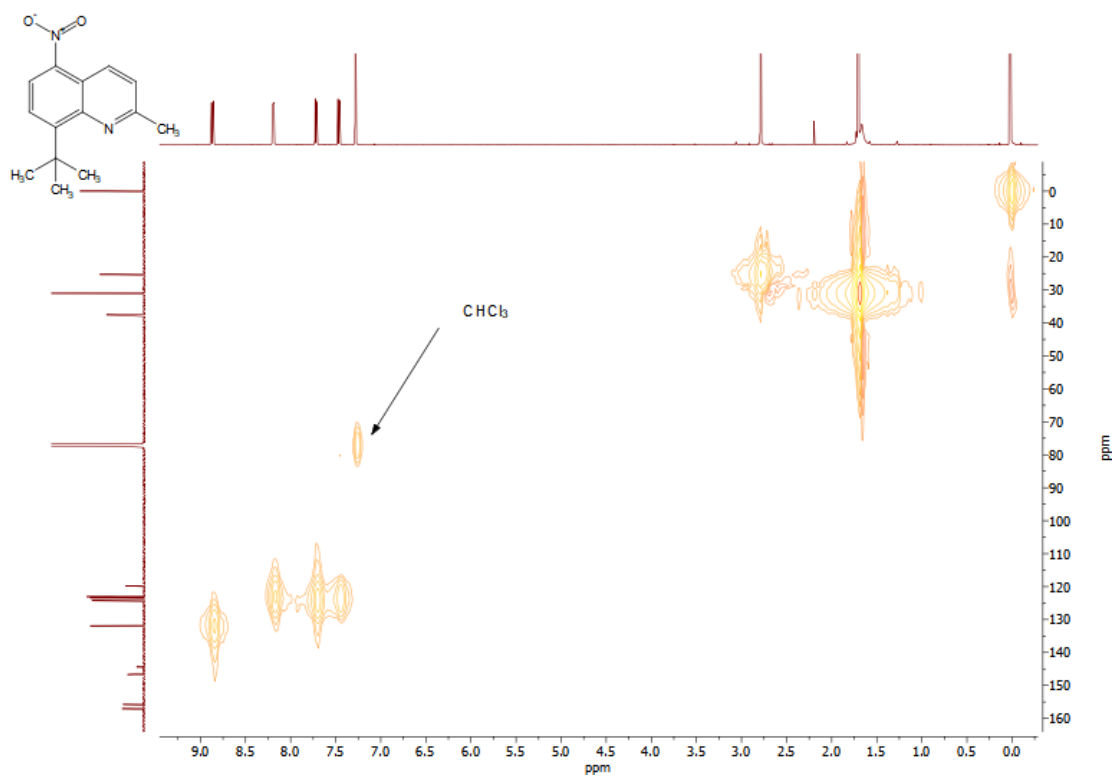

**Fig. S3c.**  $^1\text{H} - ^{13}\text{C}$  HMQC spectrum of the **4c**.

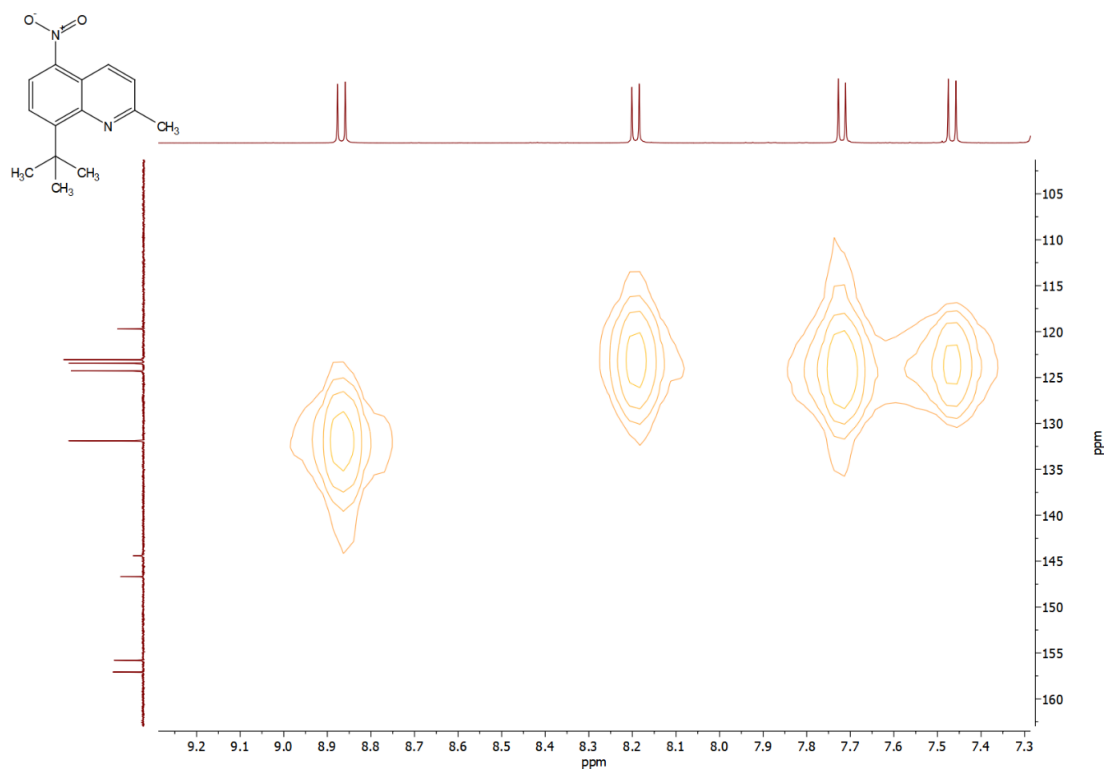

**Fig. S3d.**  $^1\text{H} - ^{13}\text{C}$  HMQC spectrum (aromatic range) of the **4c**.



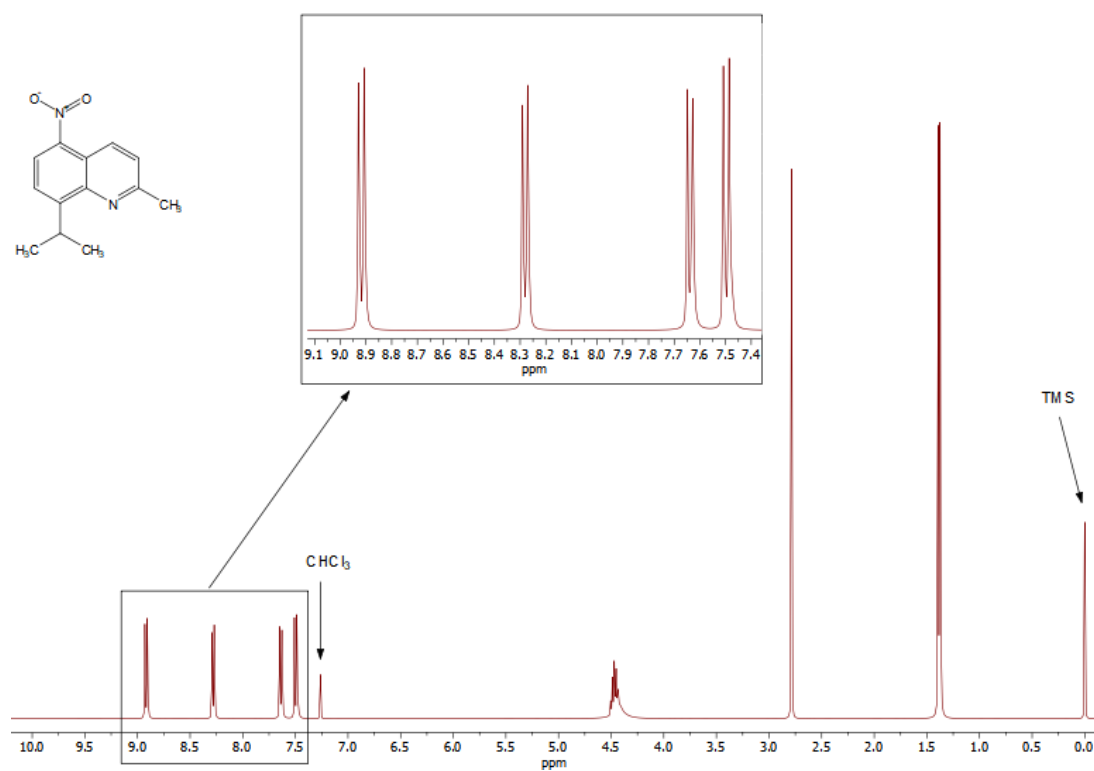

**Fig. S4a.**  $^1\text{H}$  NMR ( $\text{CDCl}_3$ ; 400.2 MHz) spectrum of the **4d**.

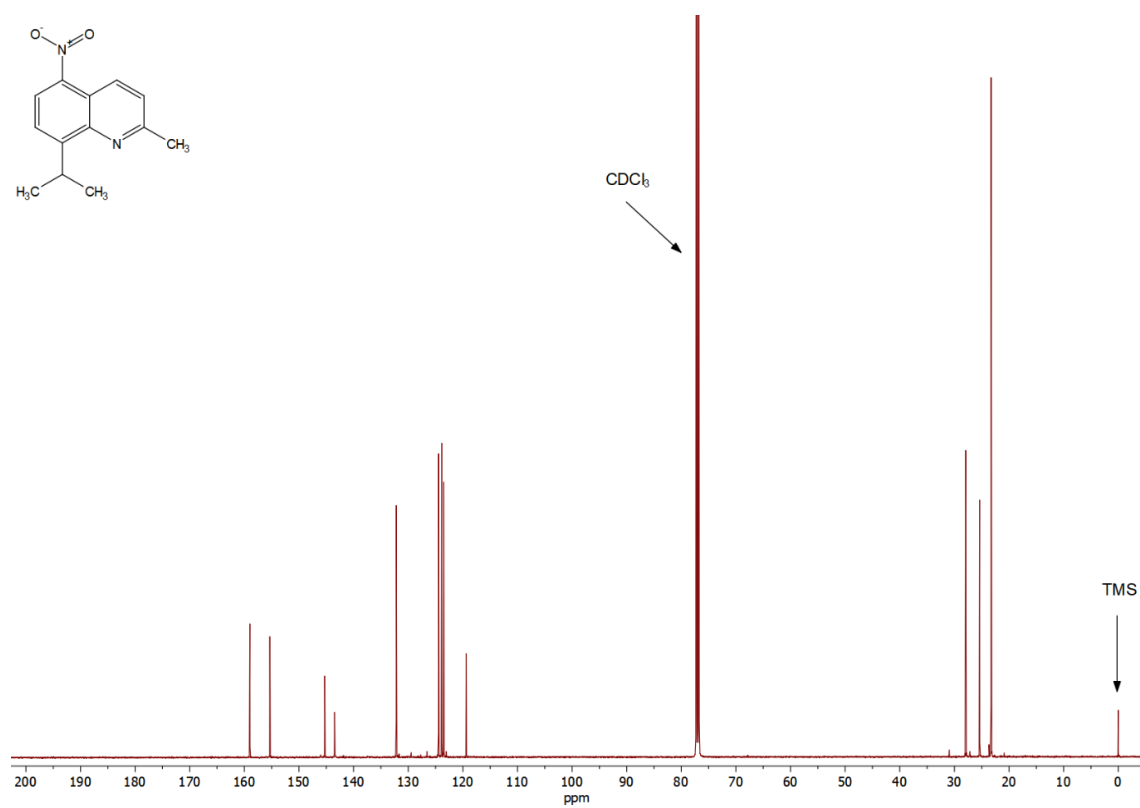

**Fig. S4b.**  $^{13}\text{C}\{^1\text{H}\}$  NMR ( $\text{CDCl}_3$ ; 125.8 MHz) spectrum of the **4d**.

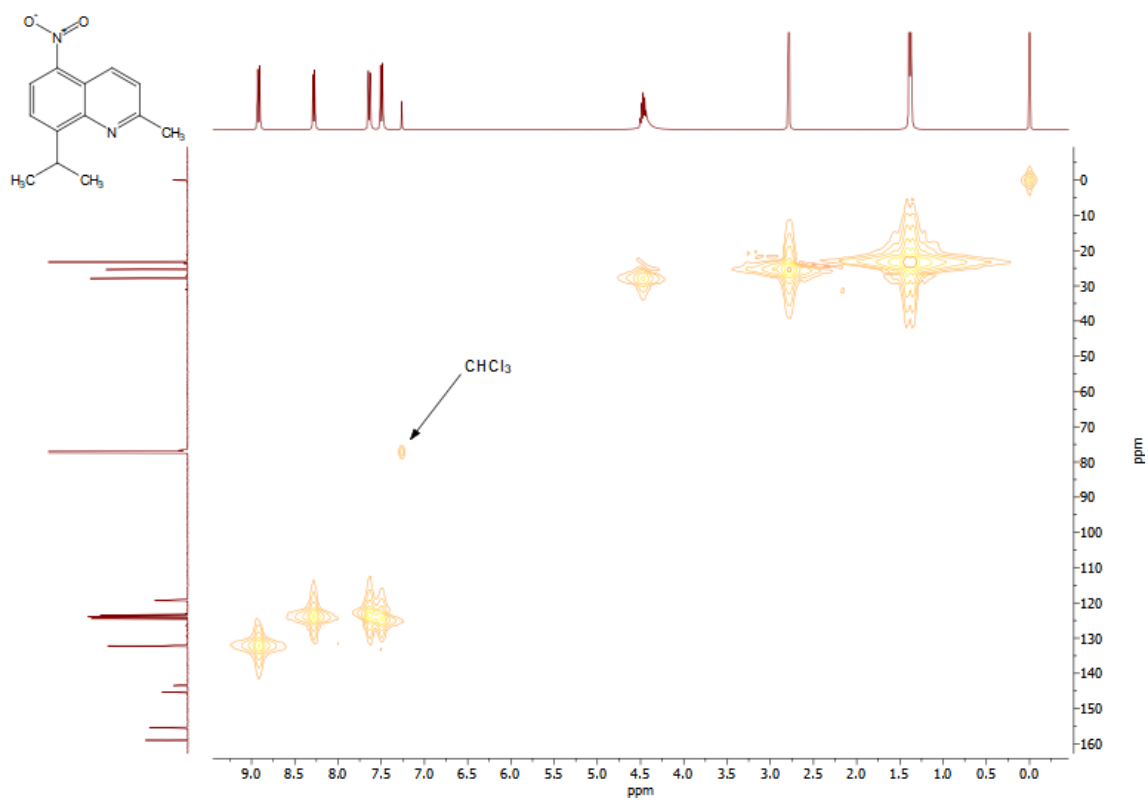

**Fig. S4c.**  $^1\text{H}$  -  $^{13}\text{C}$  HMQC spectrum of the 4d.

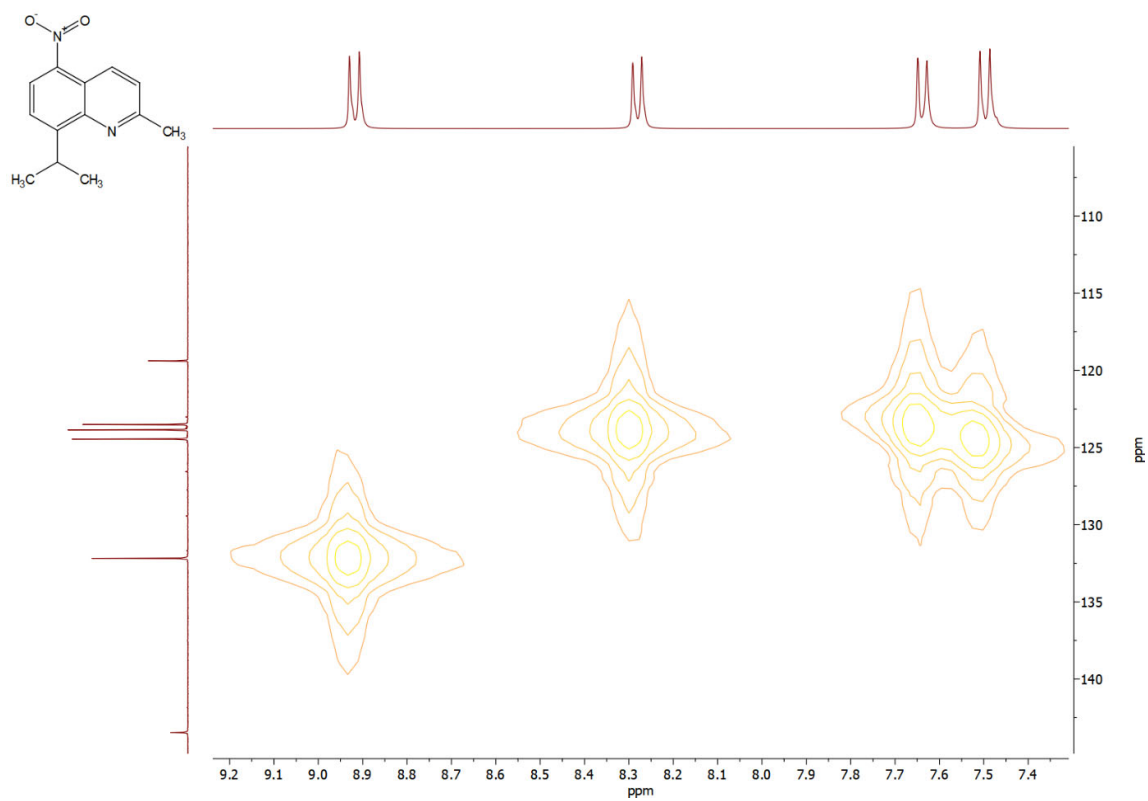

**Fig. S4d.**  $^1\text{H}$  -  $^{13}\text{C}$  HMQC spectrum (aromatic range) of the 4d.

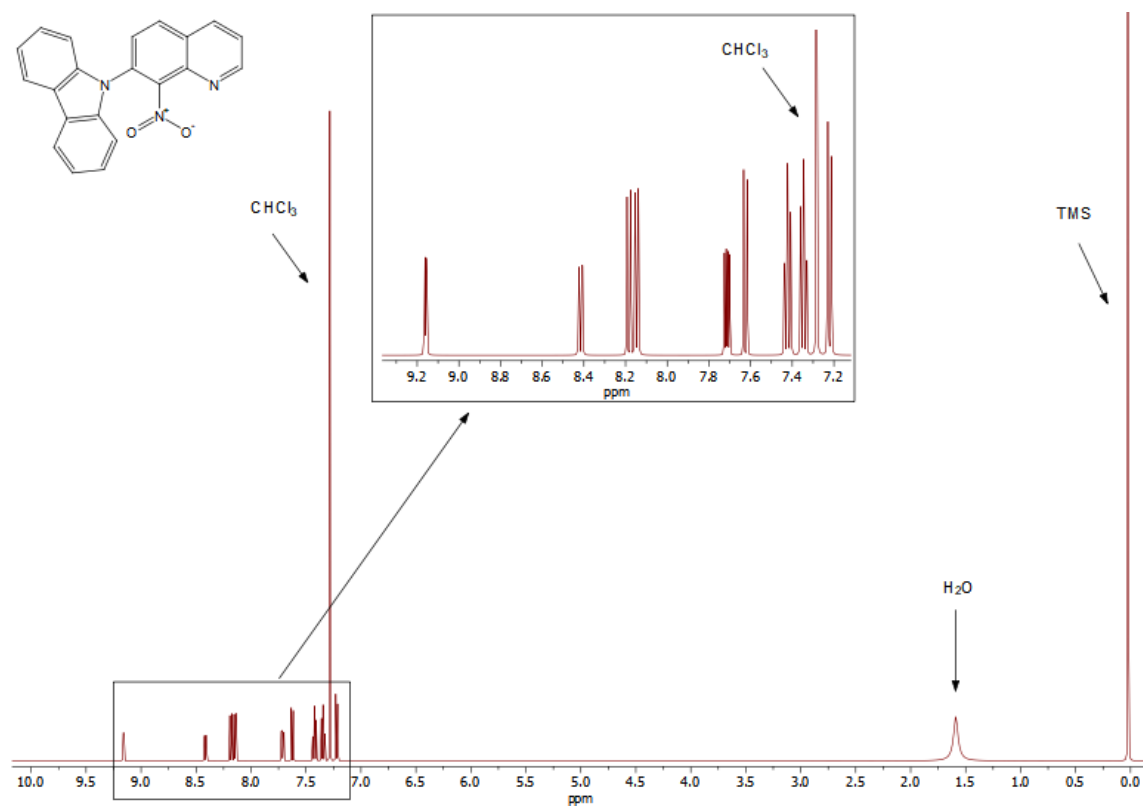

**Fig. S5a.**  $^1\text{H NMR}$  (CDCl<sub>3</sub>; 500.2 MHz) spectrum of the **5a**.

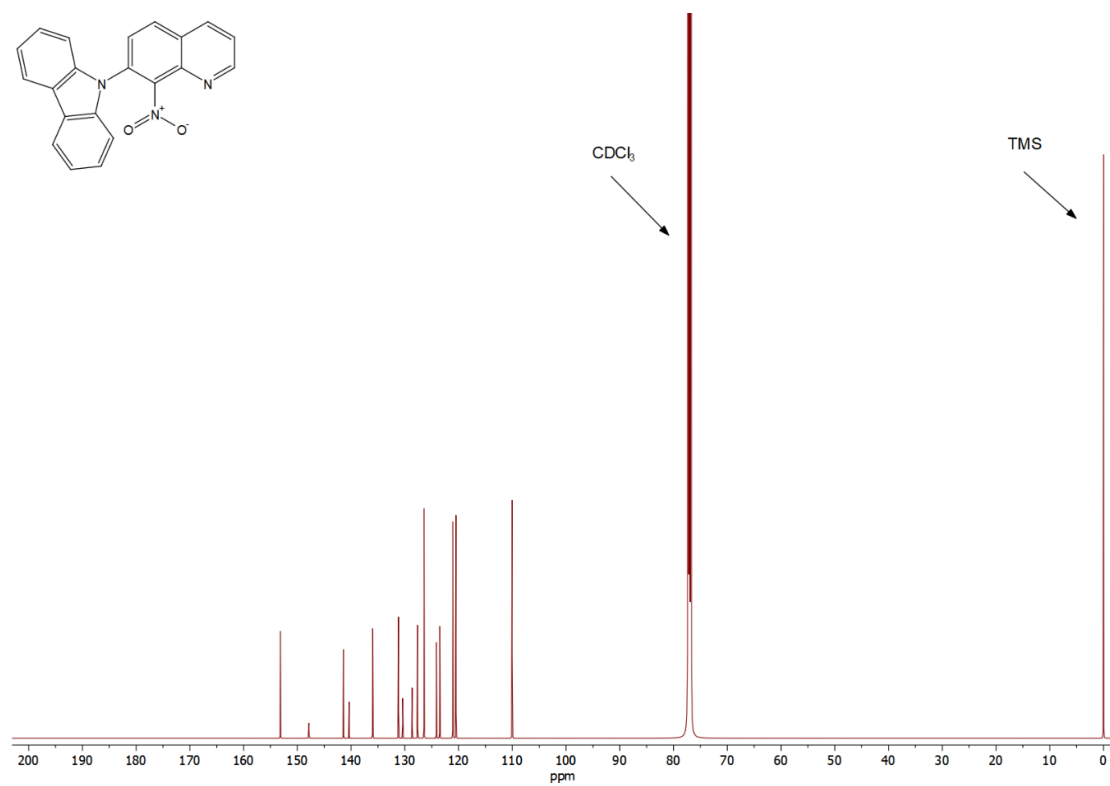

**Fig. S5b.**  $^{13}\text{C}\{^1\text{H}\}$  NMR (CDCl<sub>3</sub>; 125.8 MHz) spectrum of the **5a**.

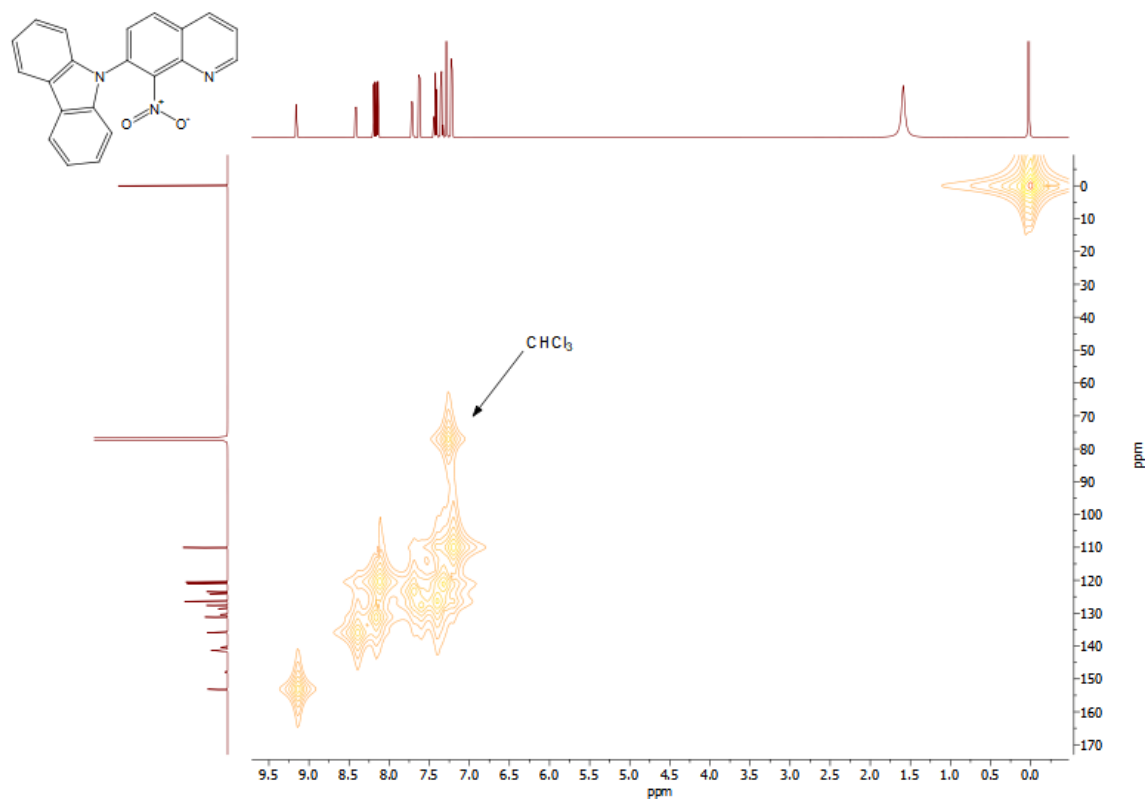

Fig. S5c.  $^1\text{H}$  -  $^{13}\text{C}$  HMQC spectrum of the 5a.

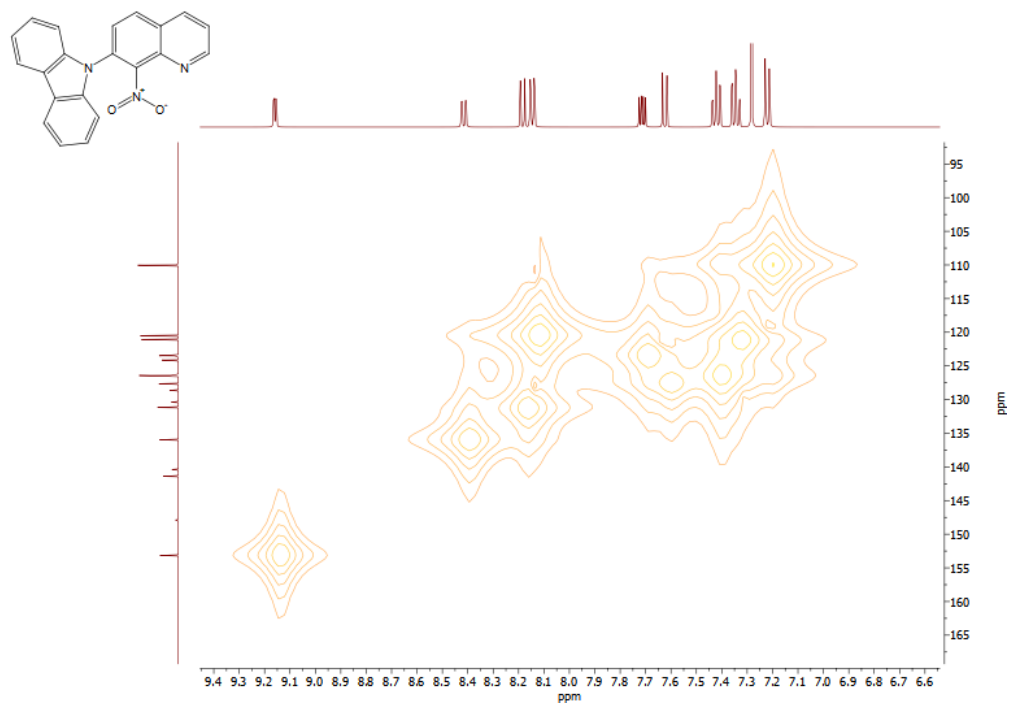

Fig. S5d.  $^1\text{H}$  -  $^{13}\text{C}$  HMQC spectrum (aromatic range) of the 5a.

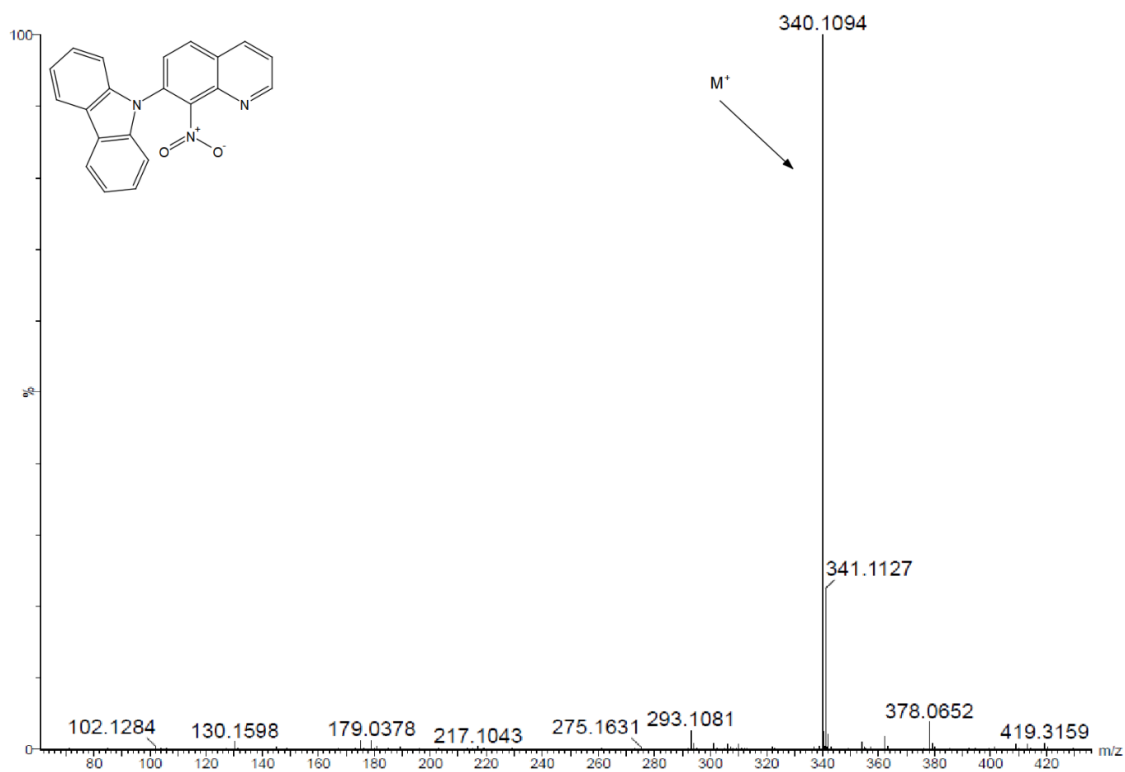

**Fig. S5e.** MS spectrum of the **5a**.

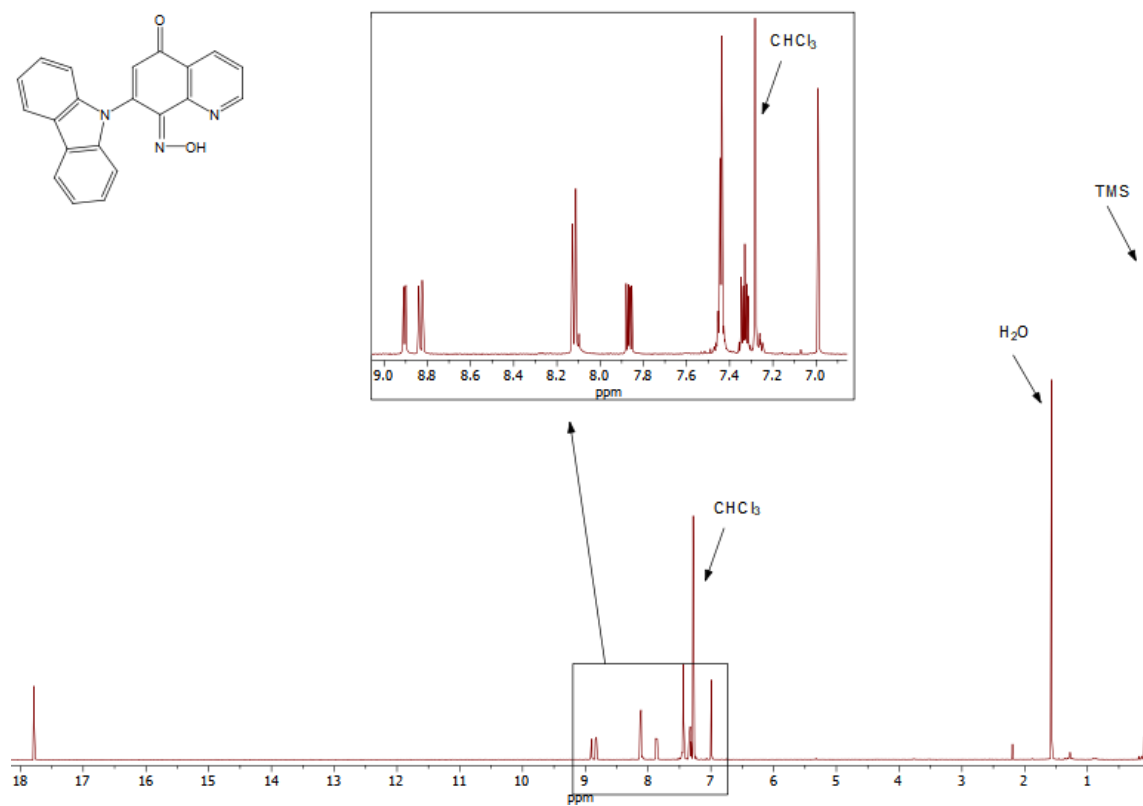

**Fig. S6a.**  $^1\text{H}$  NMR ( $\text{CDCl}_3$ ; 500.2 MHz) spectrum of the **5b**.

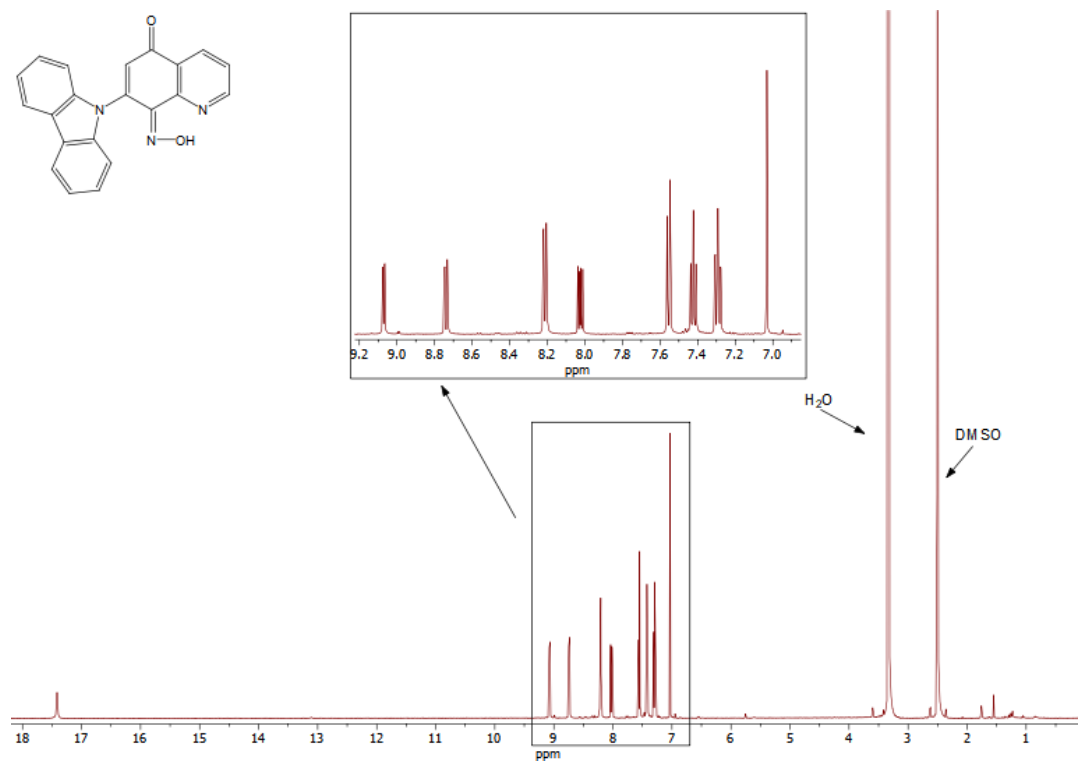

**Fig. S6b.**  $^1\text{H}$  NMR ( $\text{DMSO}-d_6$ ; 500.2 MHz) spectrum of the **5b**.

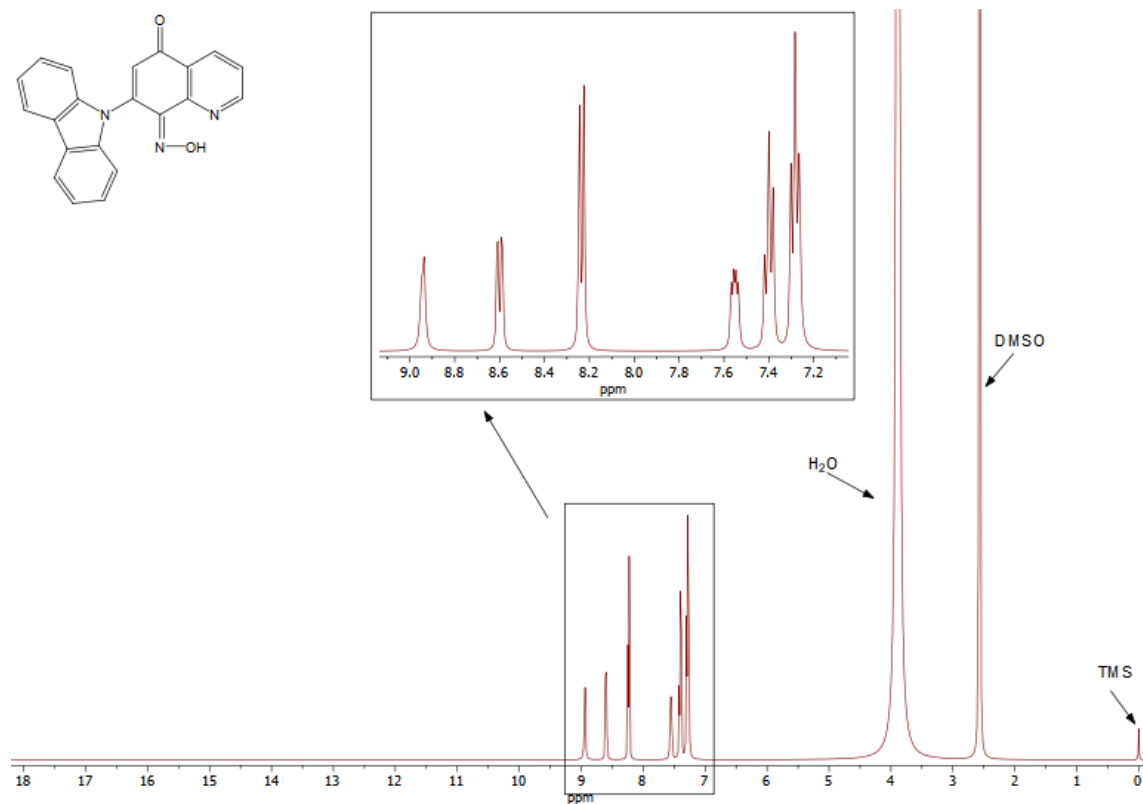

**Fig. S6c.**  $^1\text{H}$  NMR (DMSO- $d_6$ /KOD/ $D_2\text{O}$ ; 500.2 MHz) spectrum of the **5b**

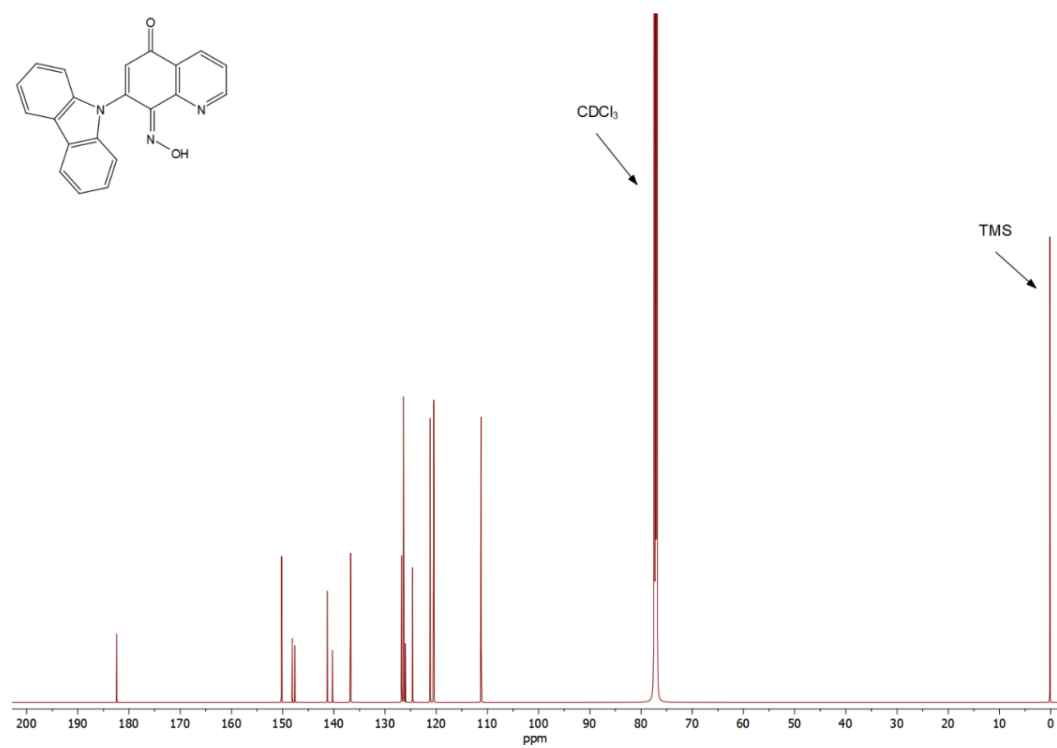

**Fig. S6d.**  $^{13}\text{C}\{^1\text{H}\}$  NMR ( $\text{CDCl}_3$ ; 125.8 MHz) spectrum of the **5b**.

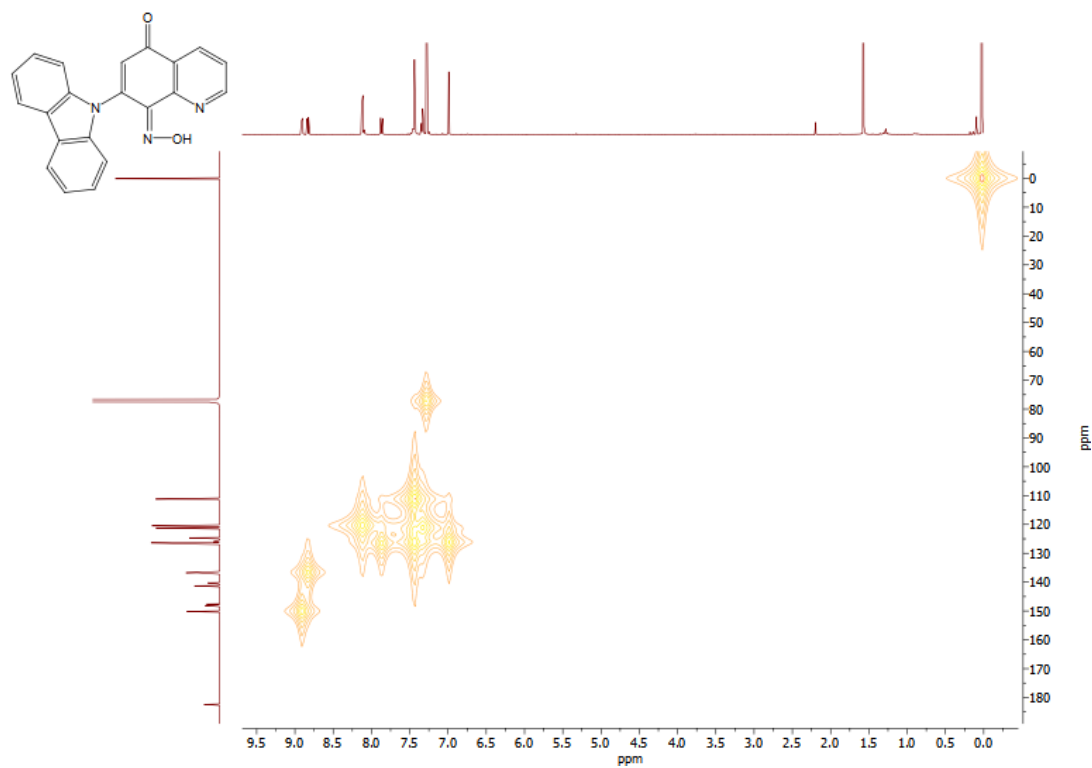

**Fig. S6e.**  $^1\text{H}$  -  $^{13}\text{C}$  HMQC spectrum of the **5b**.

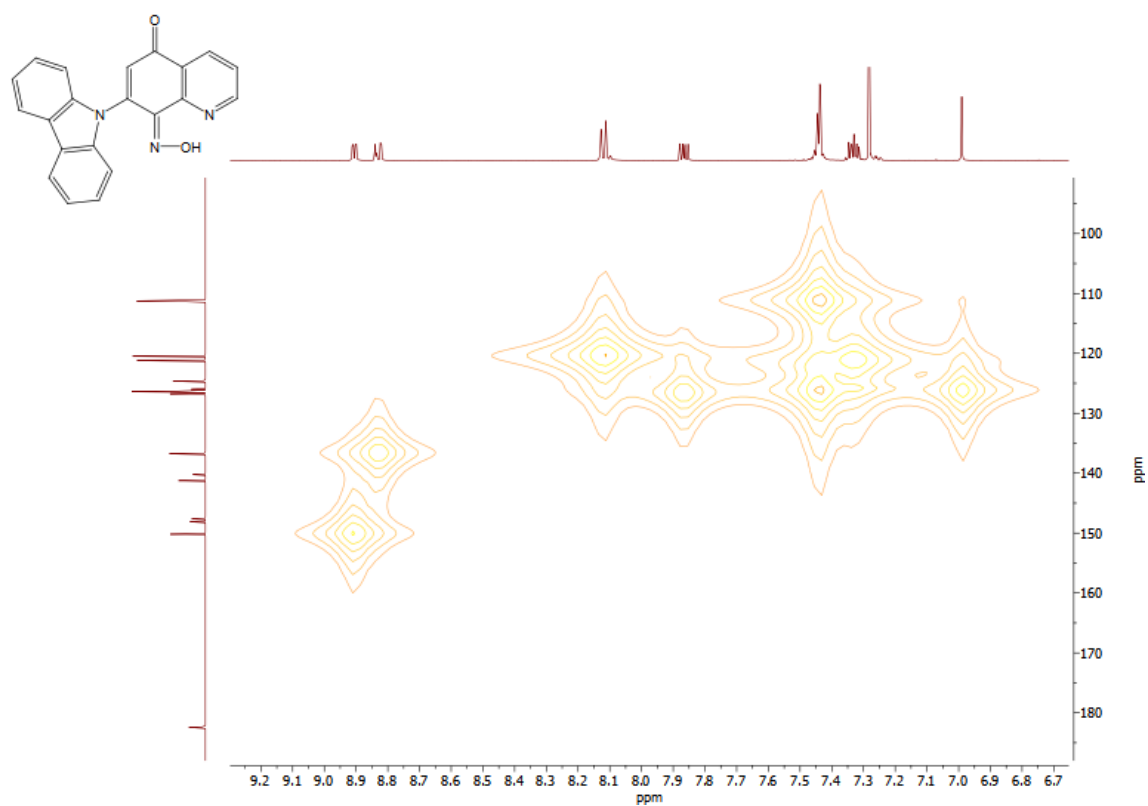

**Fig. S6f.**  $^1\text{H}$  -  $^{13}\text{C}$  HMQC spectrum (aromatic range) of the **5b**.



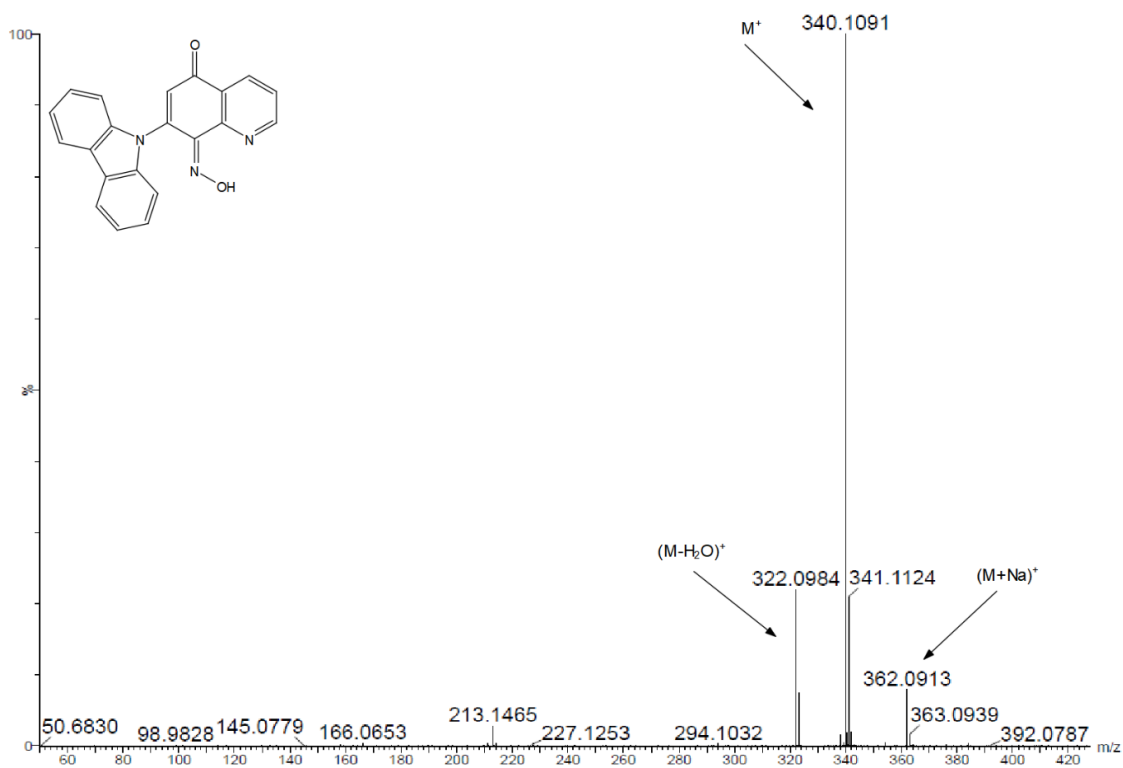

**Fig. S6g.** MS spectrum of the **5b**.

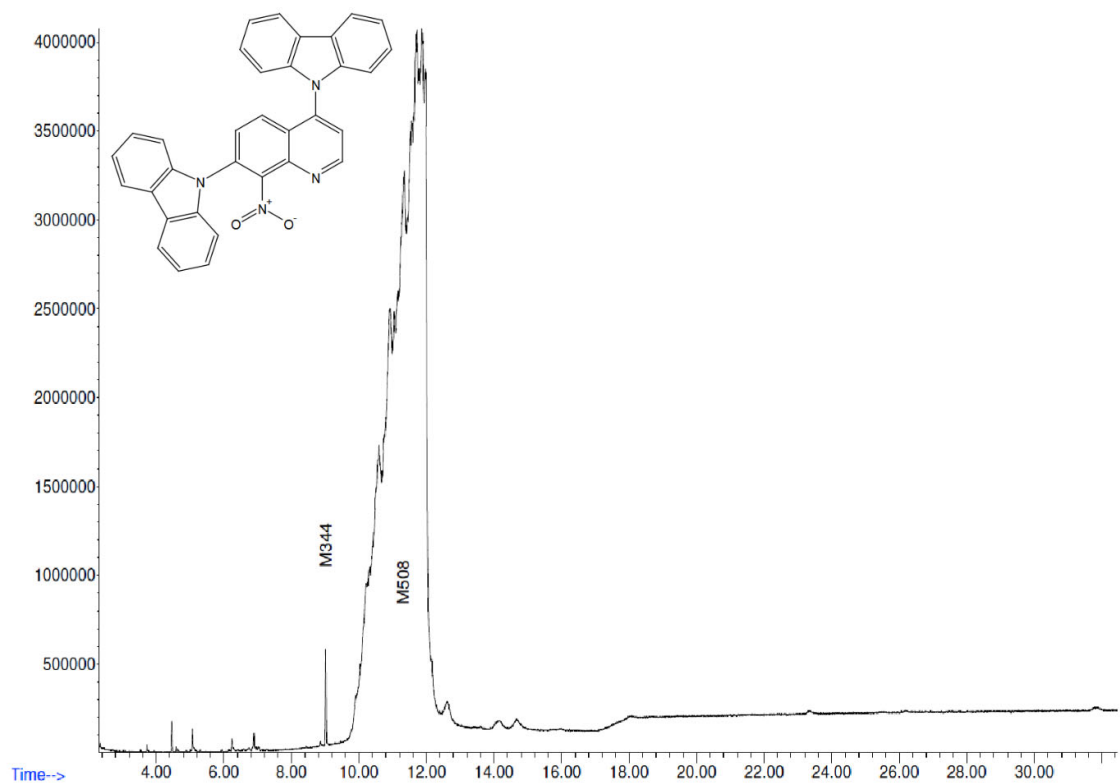

Fig. S7a. Chromatogram of the structure similar to molecule 5c.

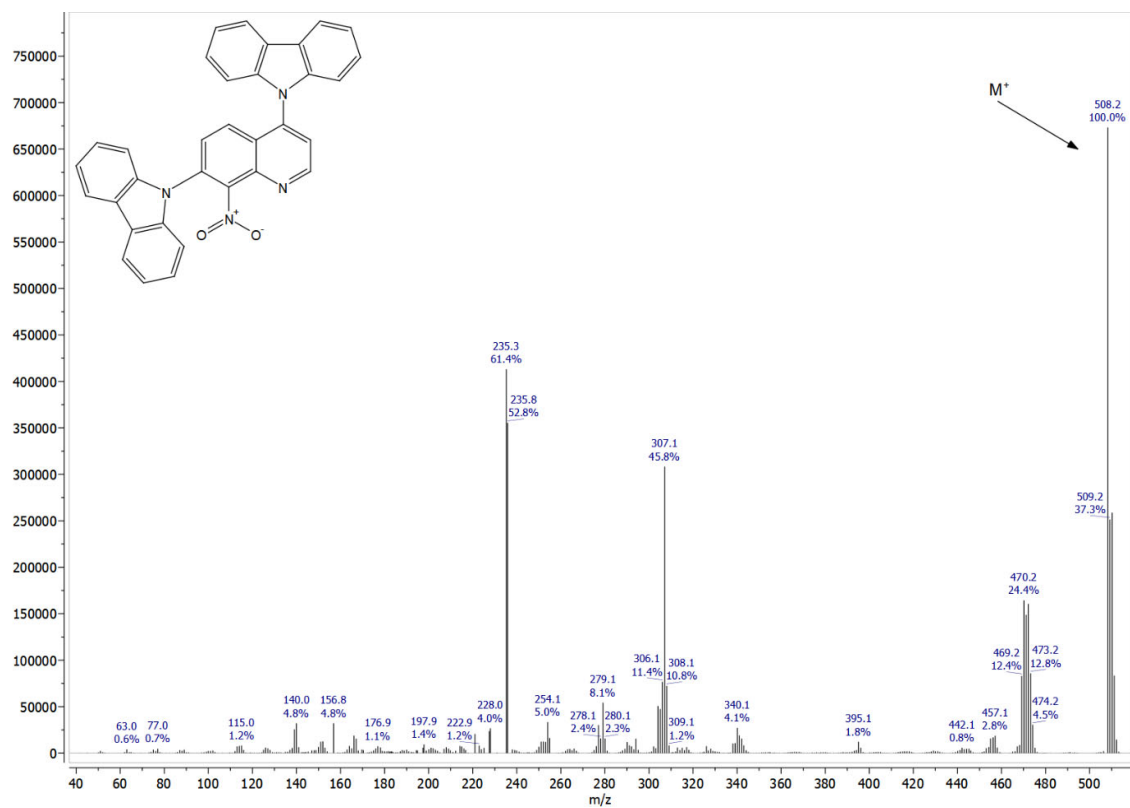

Fig. S7b. MS of the structure similar to molecule 5c.

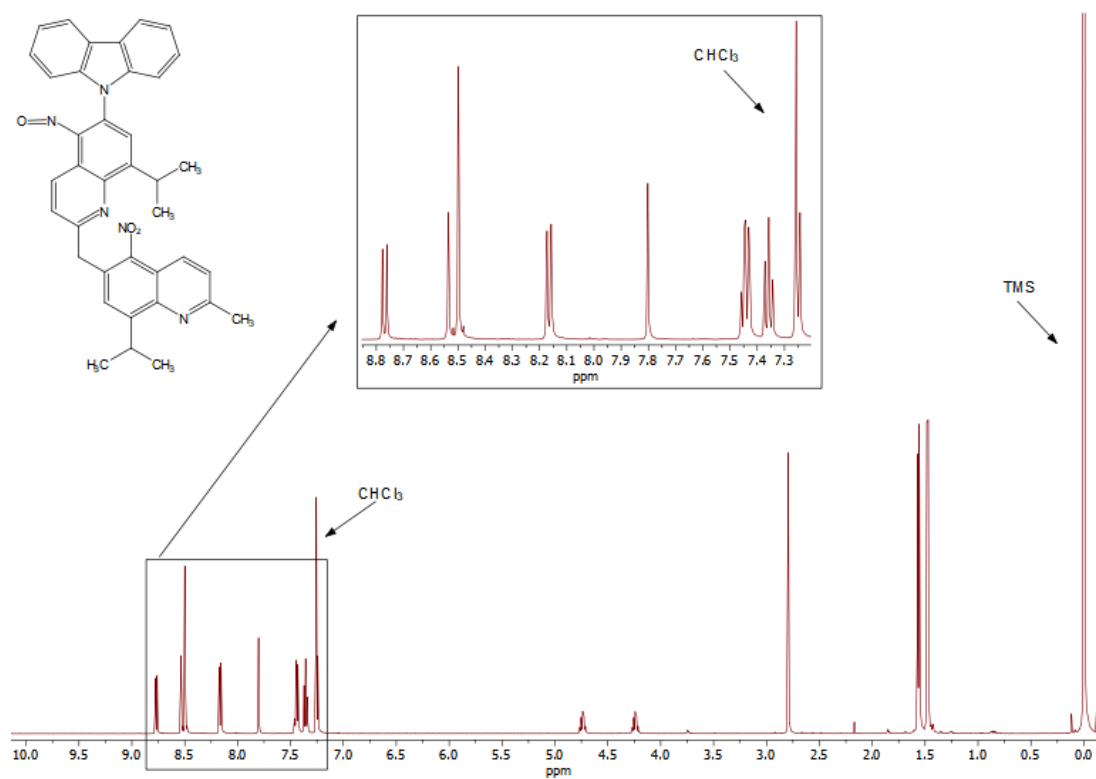

**Fig. S8a.**  $^1\text{H}$  NMR (CDCl<sub>3</sub>; 500.2 MHz) spectrum of the **5d**.

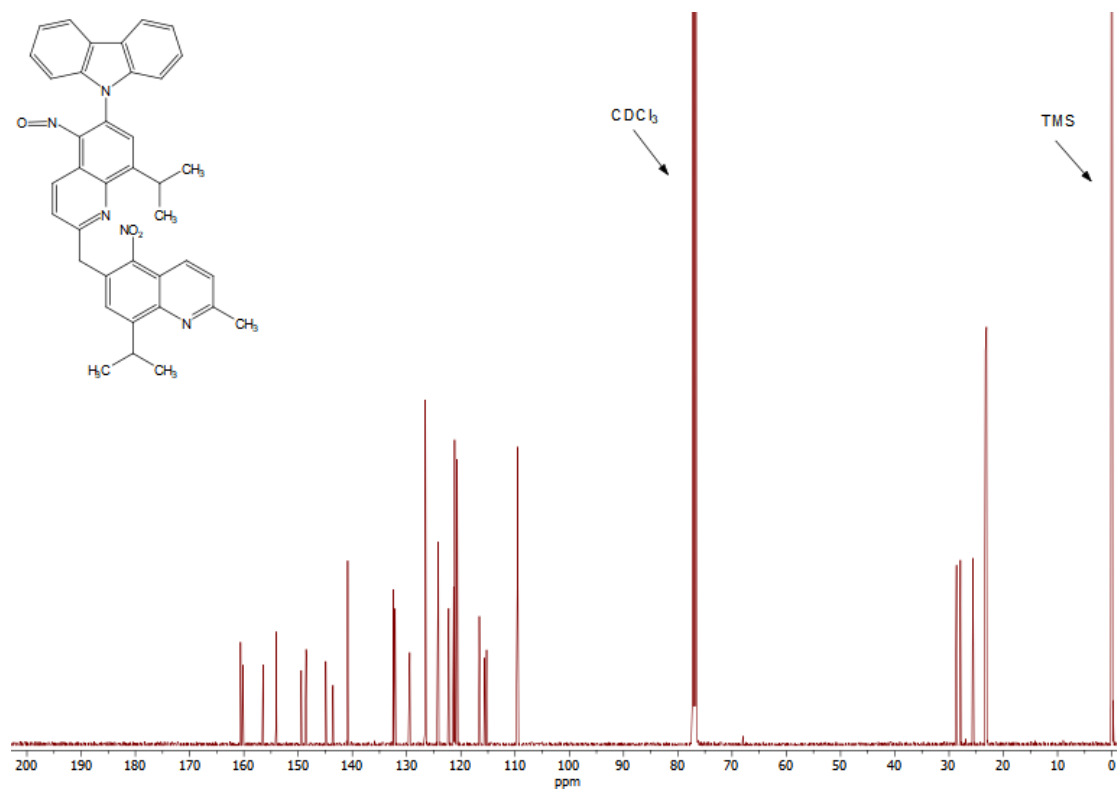

**Fig. S8b.**  $^{13}\text{C}\{^1\text{H}\}$  NMR (CDCl<sub>3</sub>; 125.8 MHz) spectrum of the **5d**.

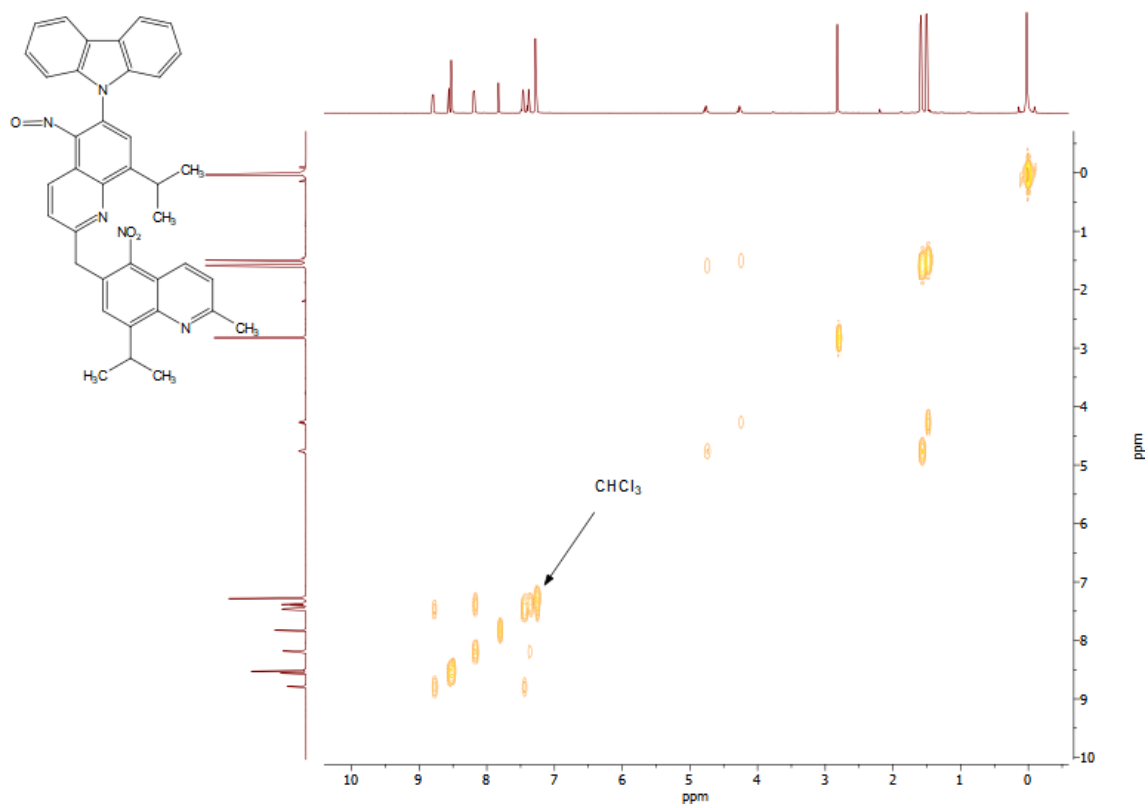

**Fig. S8c.**  $^1\text{H} - ^1\text{H}$  COSY spectrum of the **5d**.

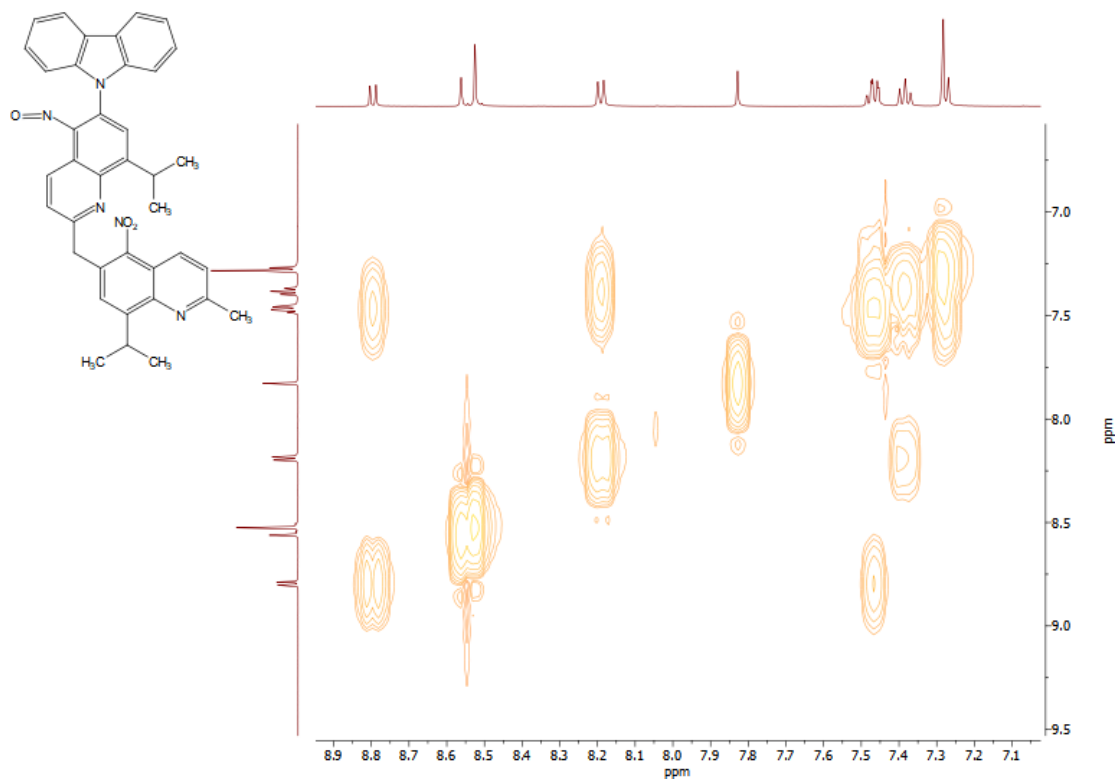

**Fig. S8d.**  $^1\text{H} - ^1\text{H}$  COSY spectrum (aromatic range) of the **5d**.

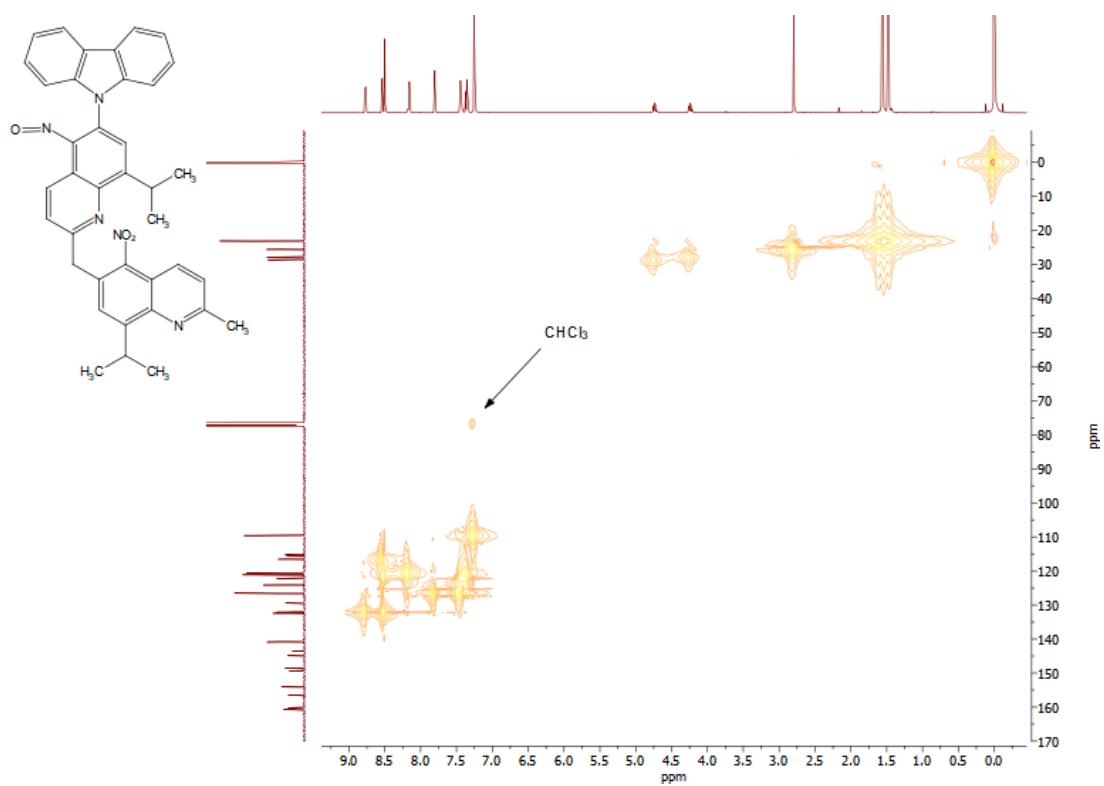

**Fig. S8e.**  $^1\text{H} - ^{13}\text{C}$  HMQC spectrum of the **5d**.

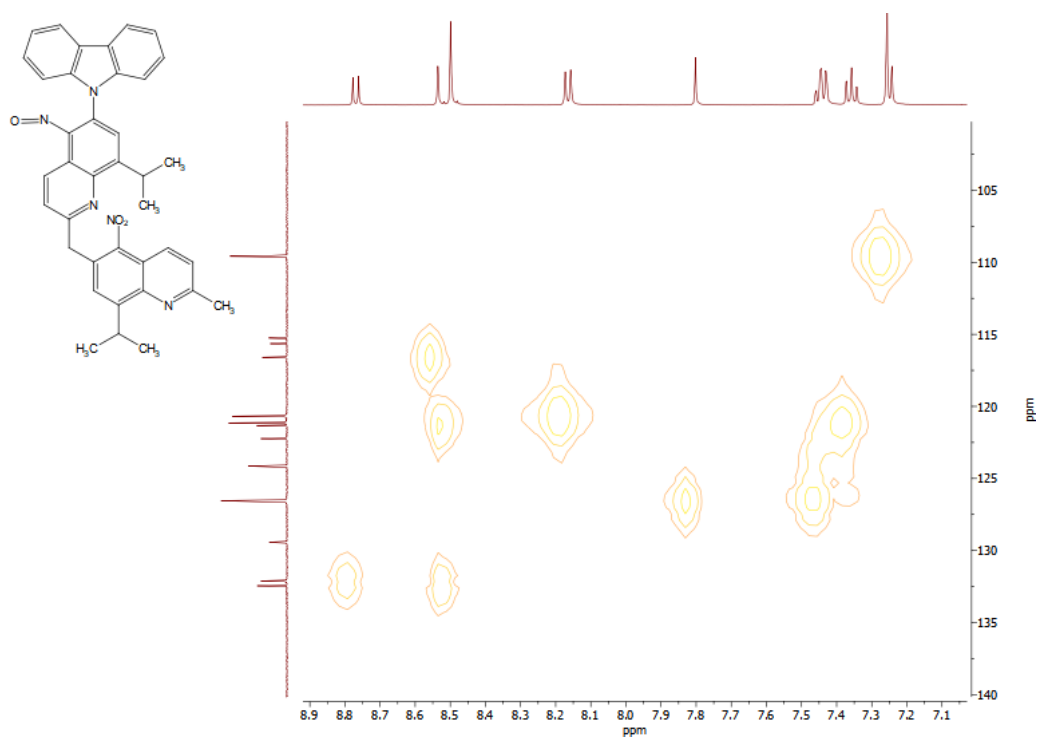

**Fig. S8f.**  $^1\text{H} - ^{13}\text{C}$  HMQC spectrum (aromatic range) of the **5d**.

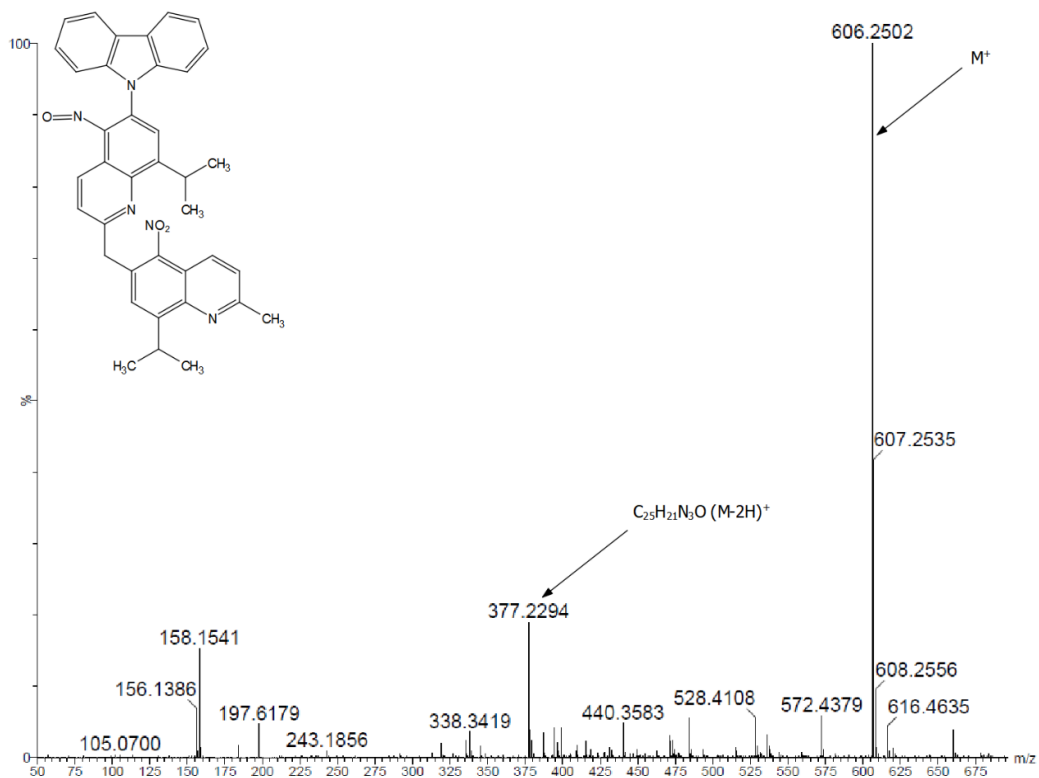

Fig. S8g. MS (ES-TOF) spectrum of the 5d.

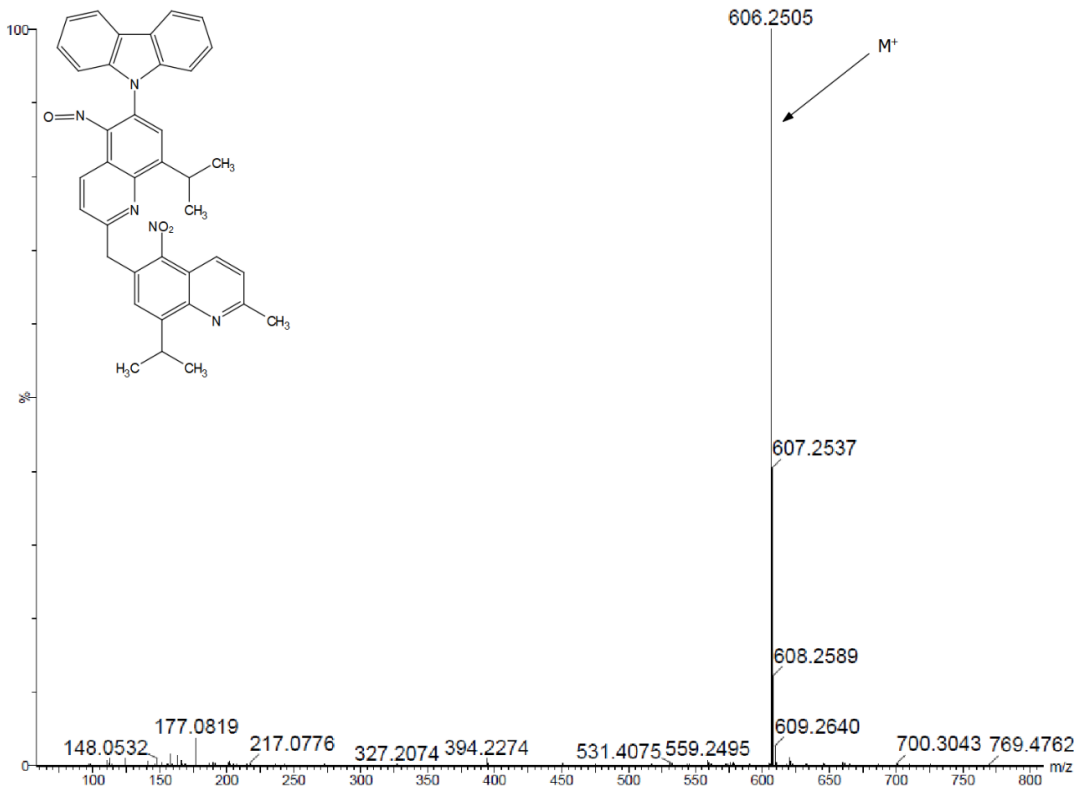

Fig. S8e. MS (AP-TOF) spectrum of the 5d.

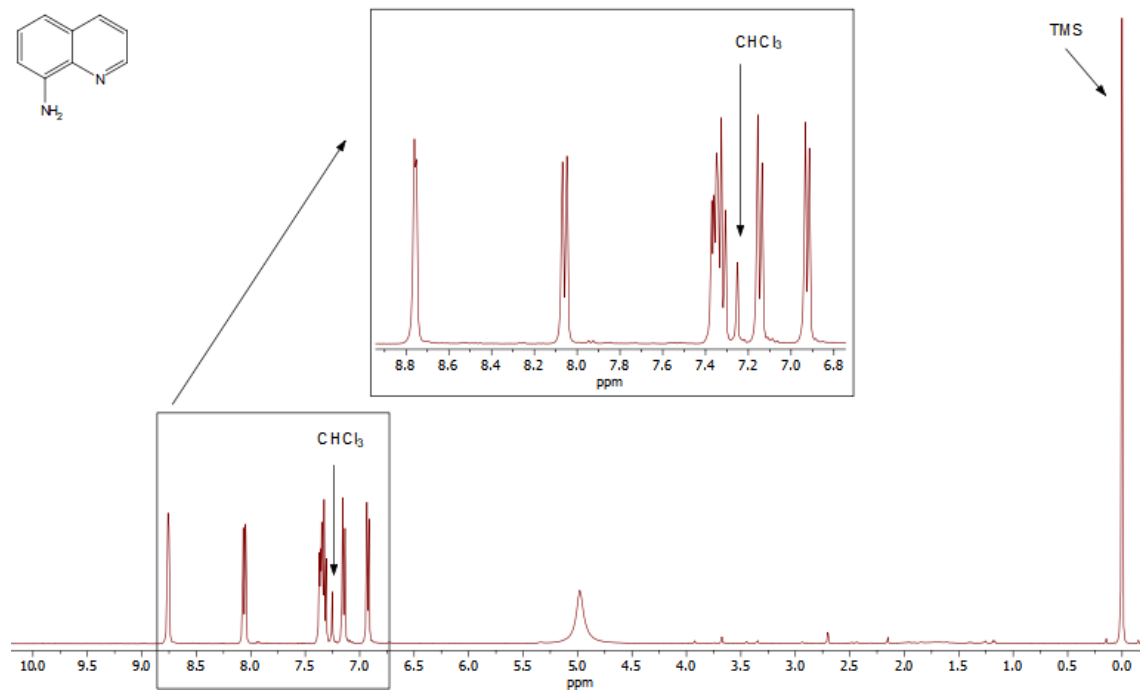

**Fig. S9.**  $^1\text{H}$  NMR ( $\text{CDCl}_3$ ; 400.2 MHz) spectrum of the **6a**.

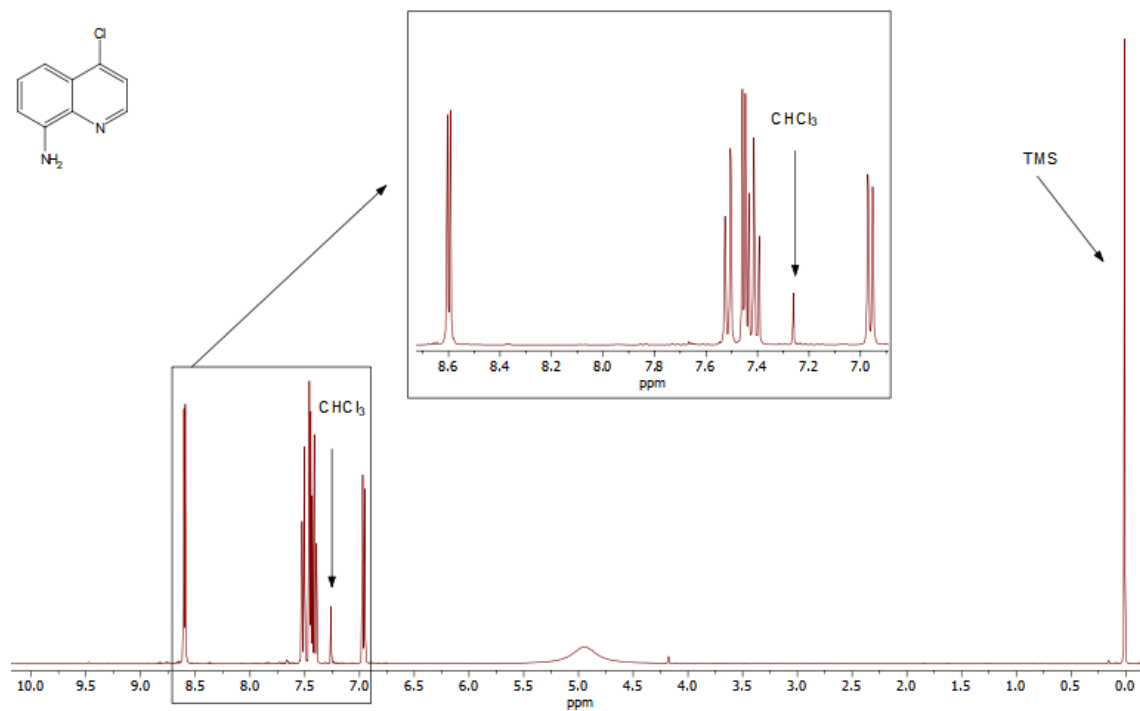

**Fig. S10a.**  $^1\text{H}$  NMR ( $\text{CDCl}_3$ ; 400.2 MHz) spectrum of the **6b**.

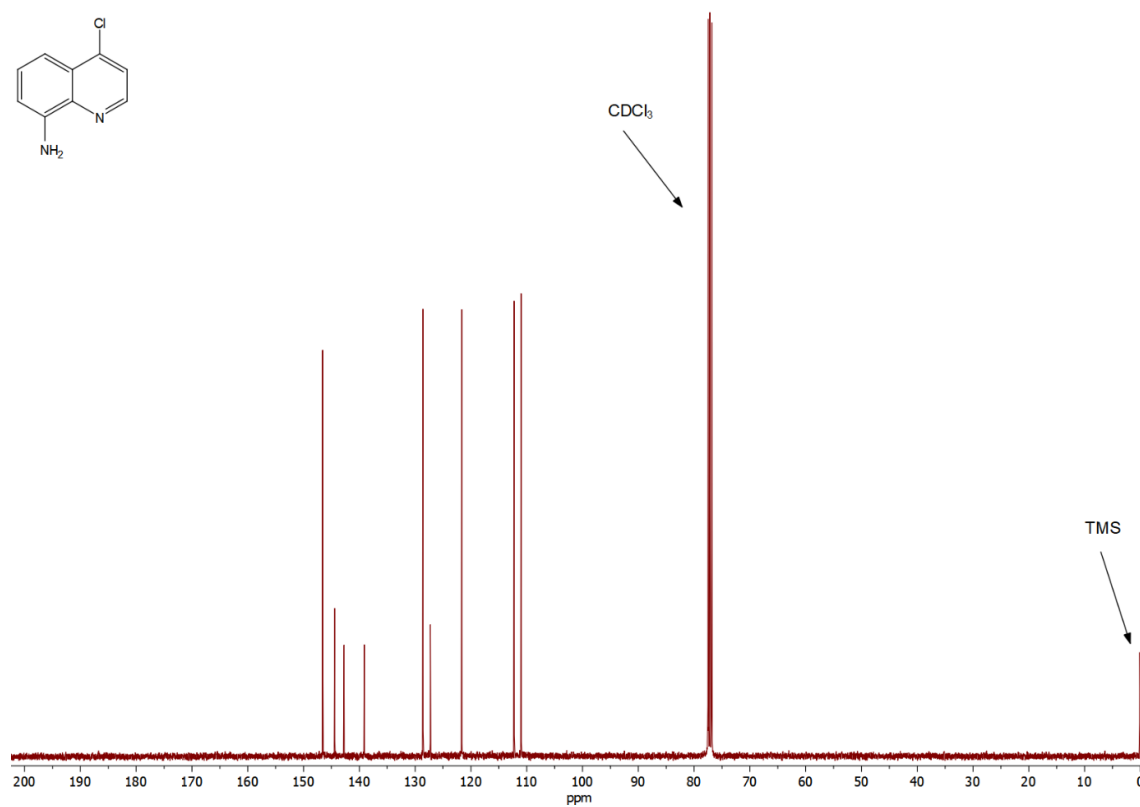

**Fig. S10b.**  $^{13}\text{C}\{^1\text{H}\}$  NMR ( $\text{CDCl}_3$ ; 100.6 MHz) spectrum of the **6b**.



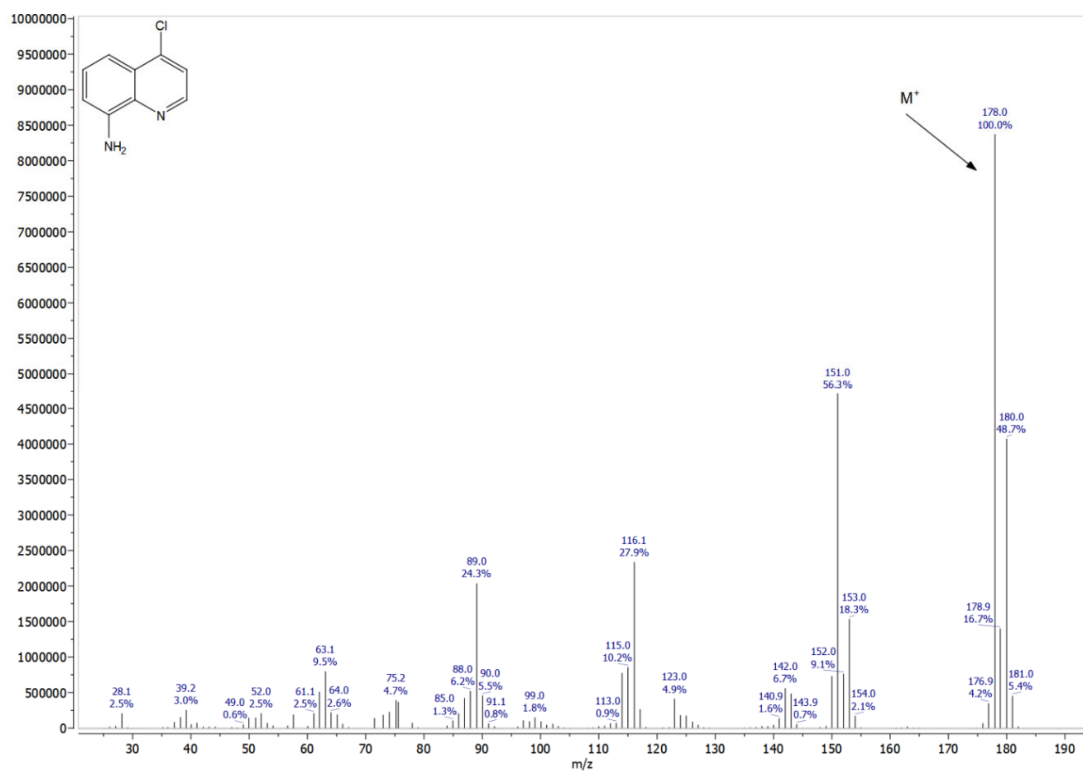

Fig. S10c. MS spectrum of the 6b.

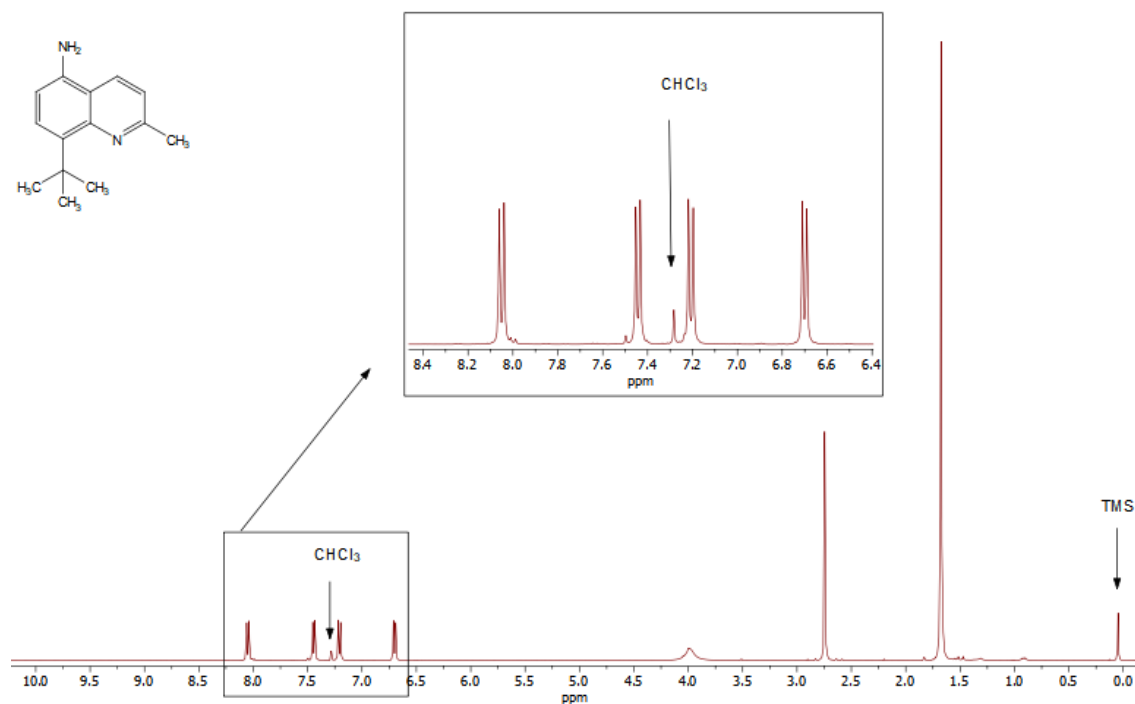

**Fig. S11a.**  $^1\text{H}$  NMR ( $\text{CDCl}_3$ ; 400.2 MHz) spectrum of the **6c**.

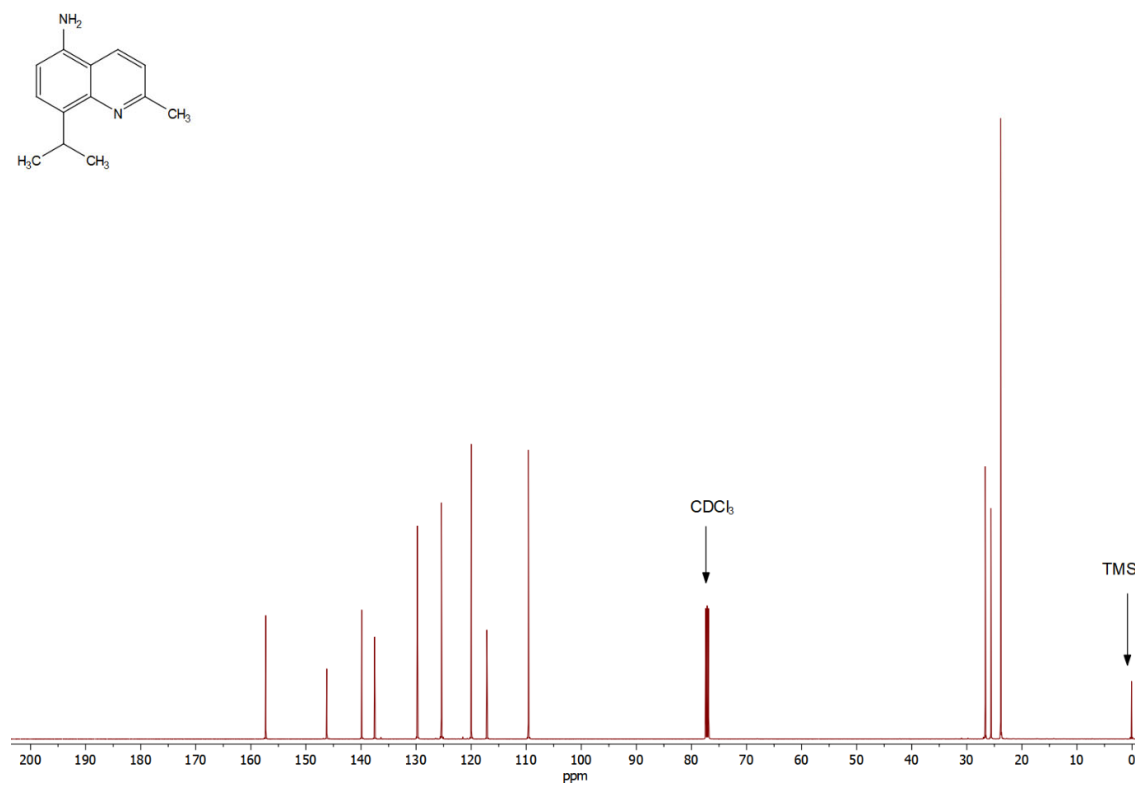

**Fig. S11b.**  $^{13}\text{C}\{^1\text{H}\}$  NMR ( $\text{CDCl}_3$ ; 100.6 MHz) spectrum of the **6c**.

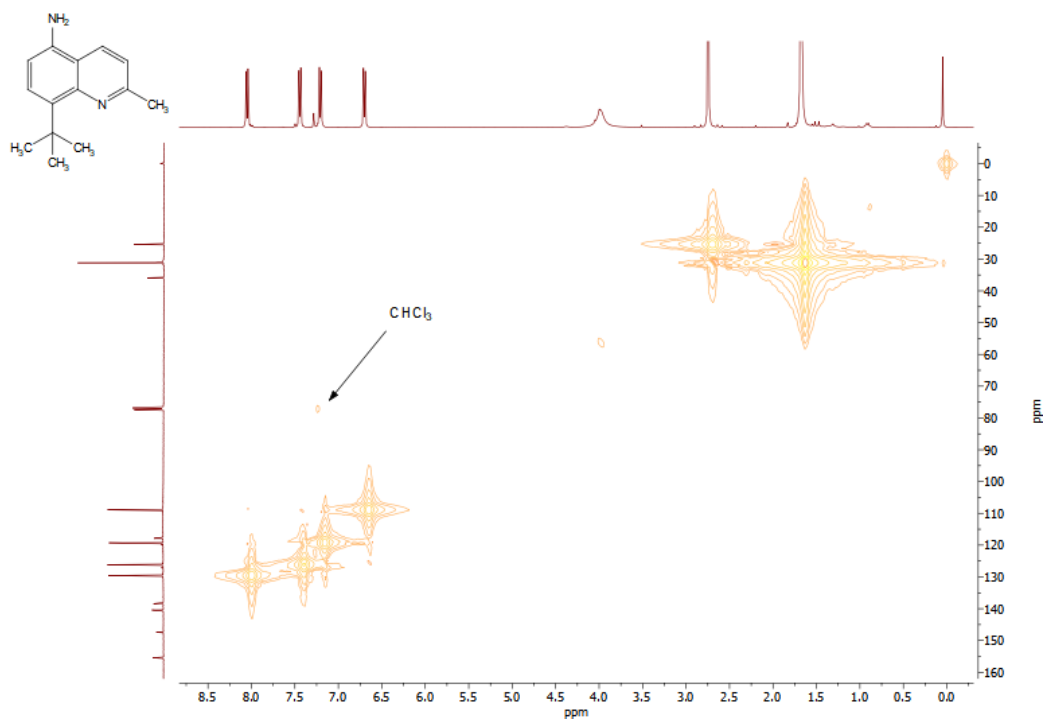

**Fig. S11c.**  $^1\text{H}$  -  $^{13}\text{C}$  HMQC spectrum of the 6c.

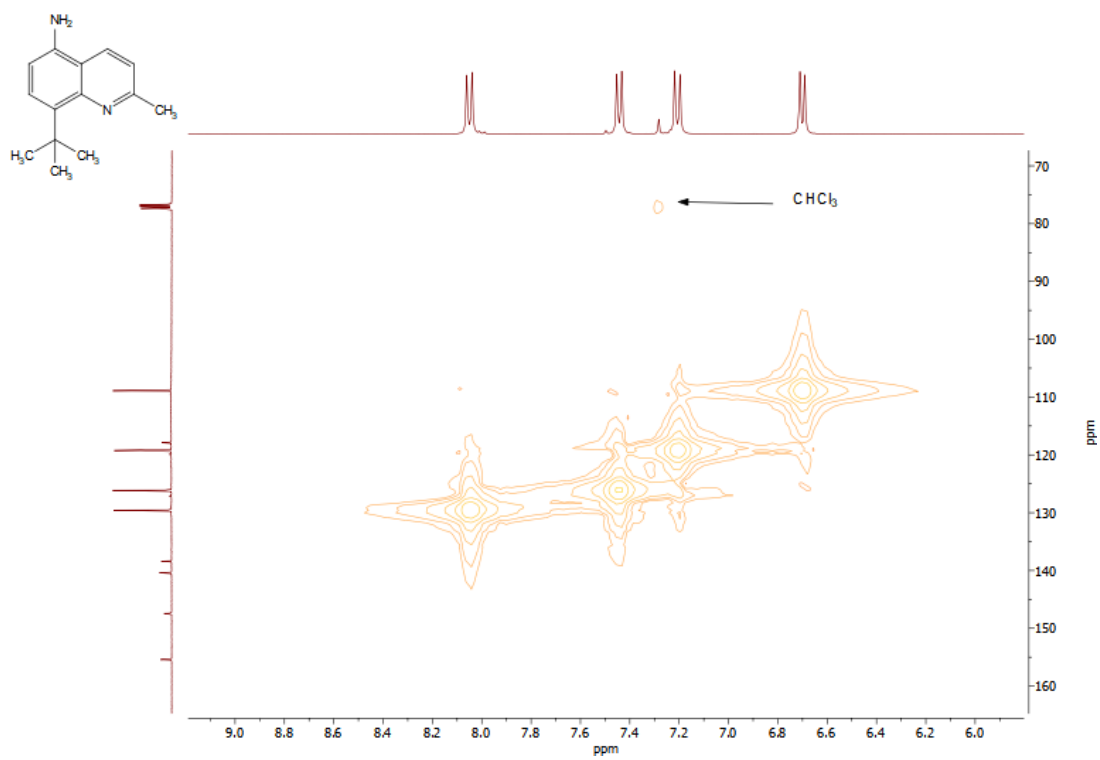

**Fig. S11d.**  $^1\text{H}$  -  $^{13}\text{C}$  HMQC spectrum (aromatic range) of the 6c.

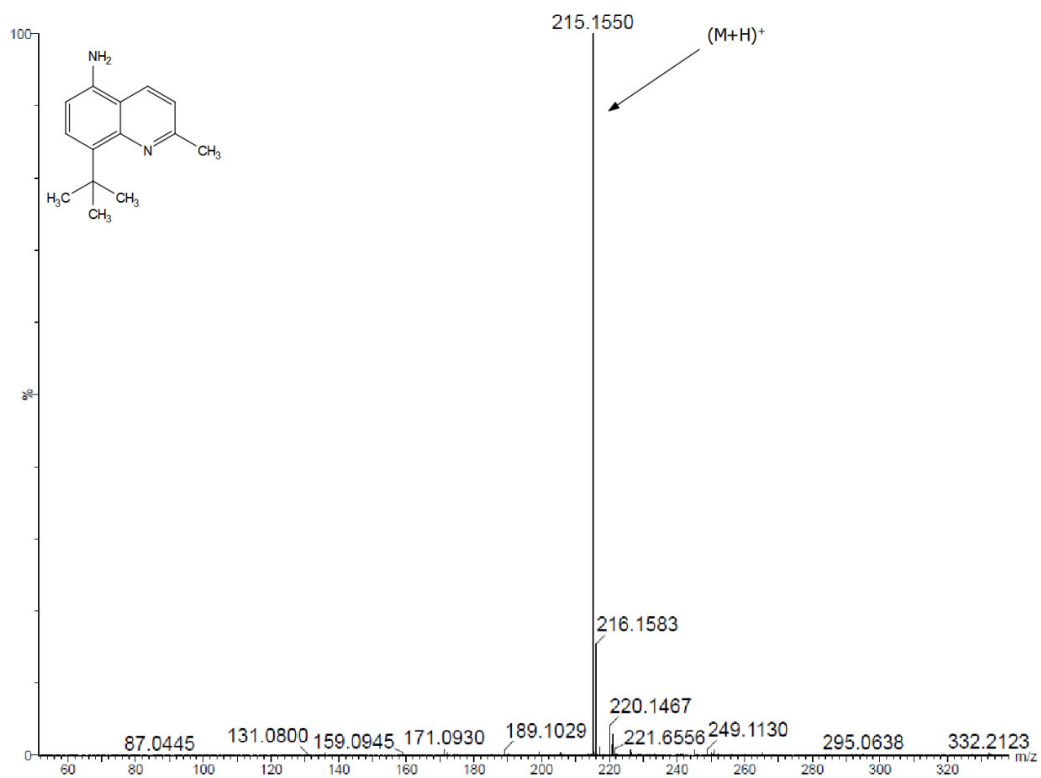

**Fig. S11e.** MS spectrum of the **6c**.

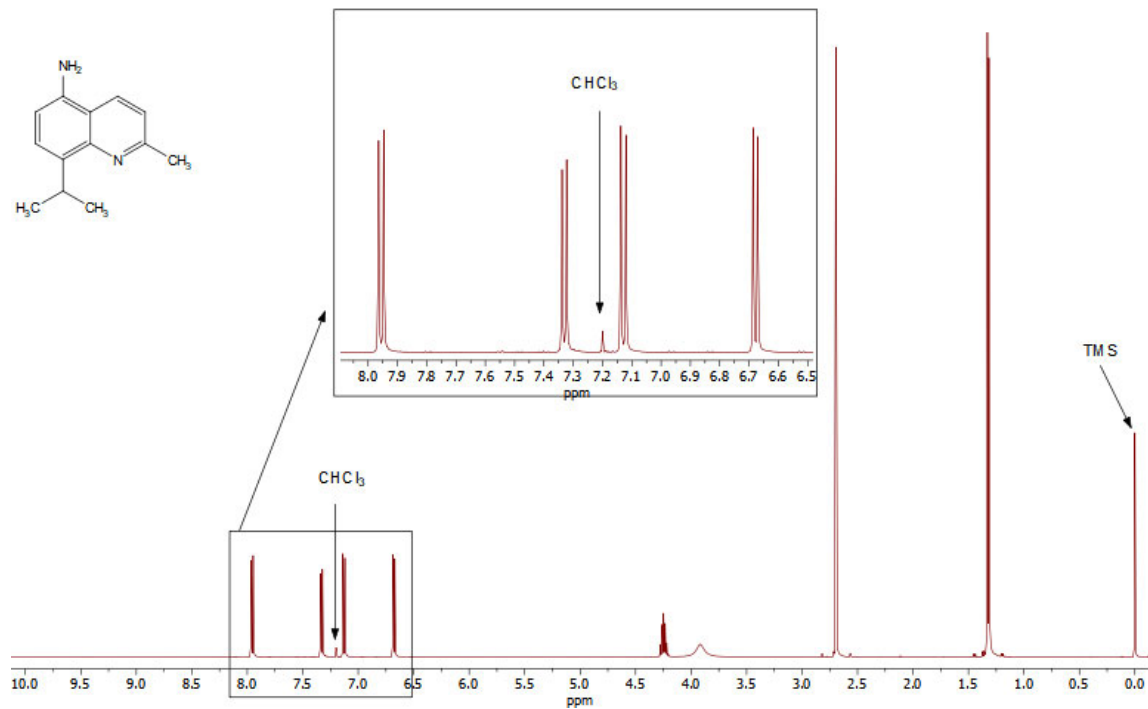

**Fig. S12a.**  $^1\text{H}$  NMR ( $\text{CDCl}_3$ ; 500.2 MHz) spectrum of the **6d**.

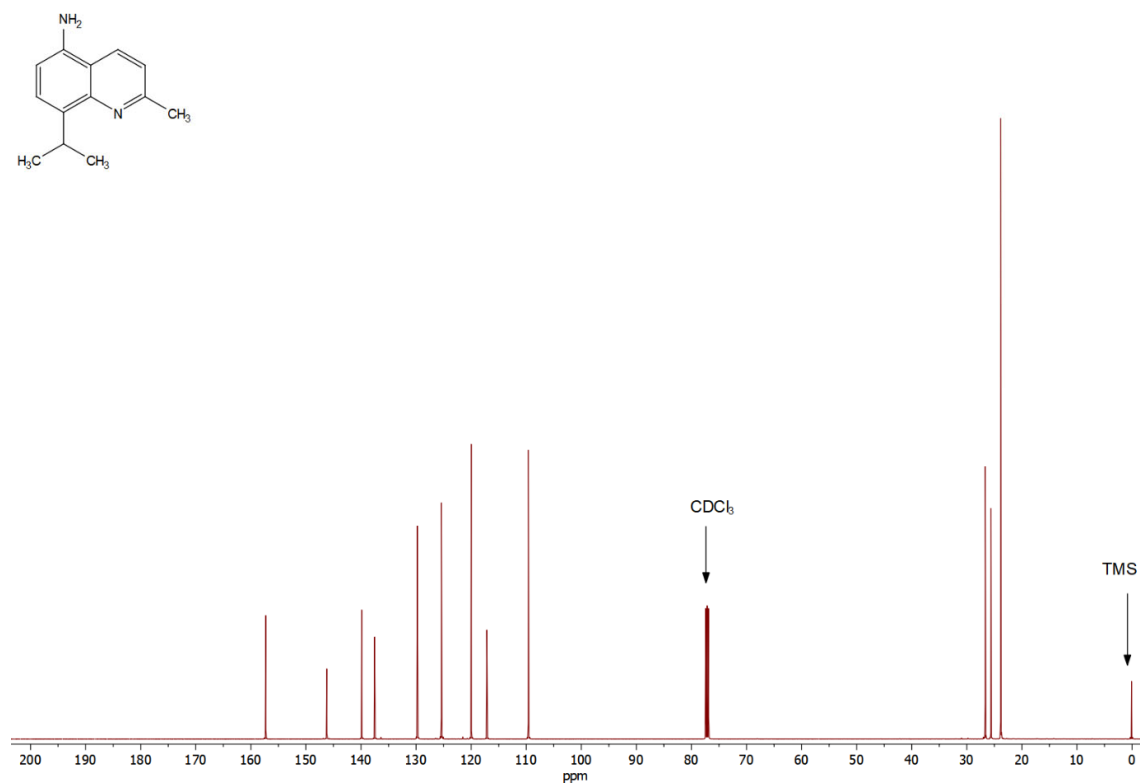

**Fig. S12b.**  $^{13}\text{C}\{^1\text{H}\}$  NMR ( $\text{CDCl}_3$ ; 125.8 MHz) spectrum of the **6d**.

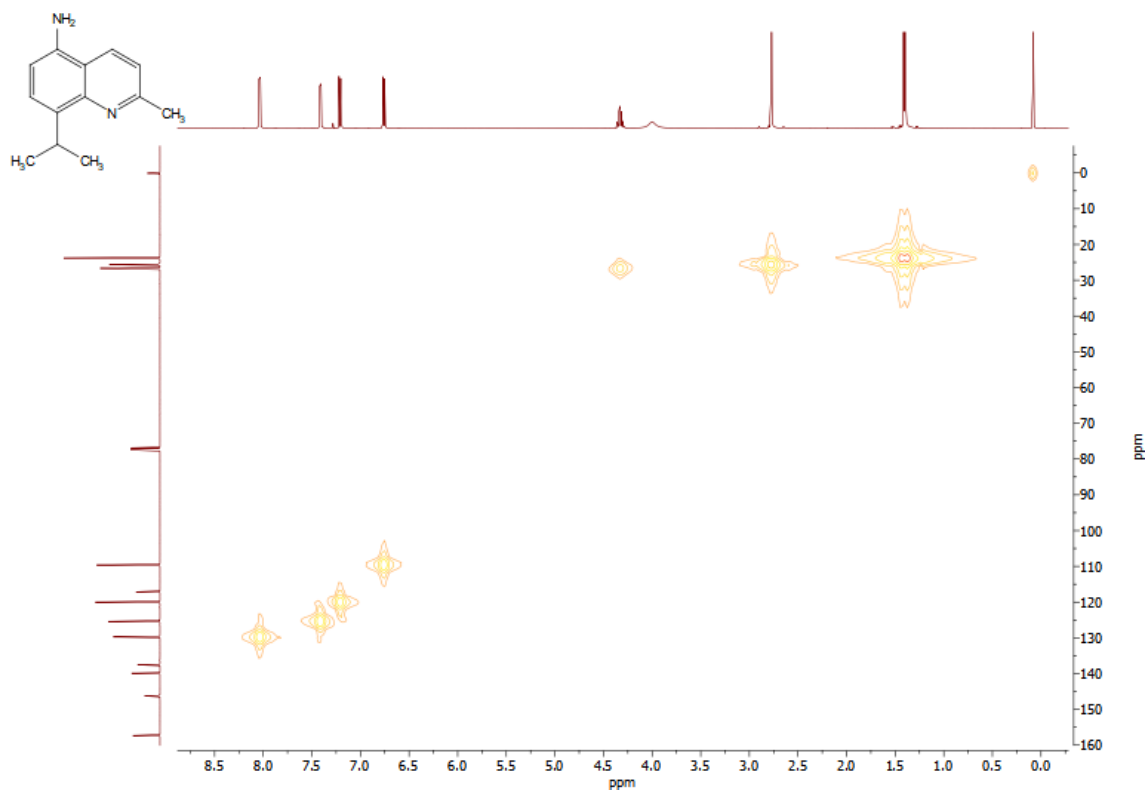

**Fig. S12c.**  $^1\text{H}$  -  $^{13}\text{C}$  HMQC spectrum of the **6d**.

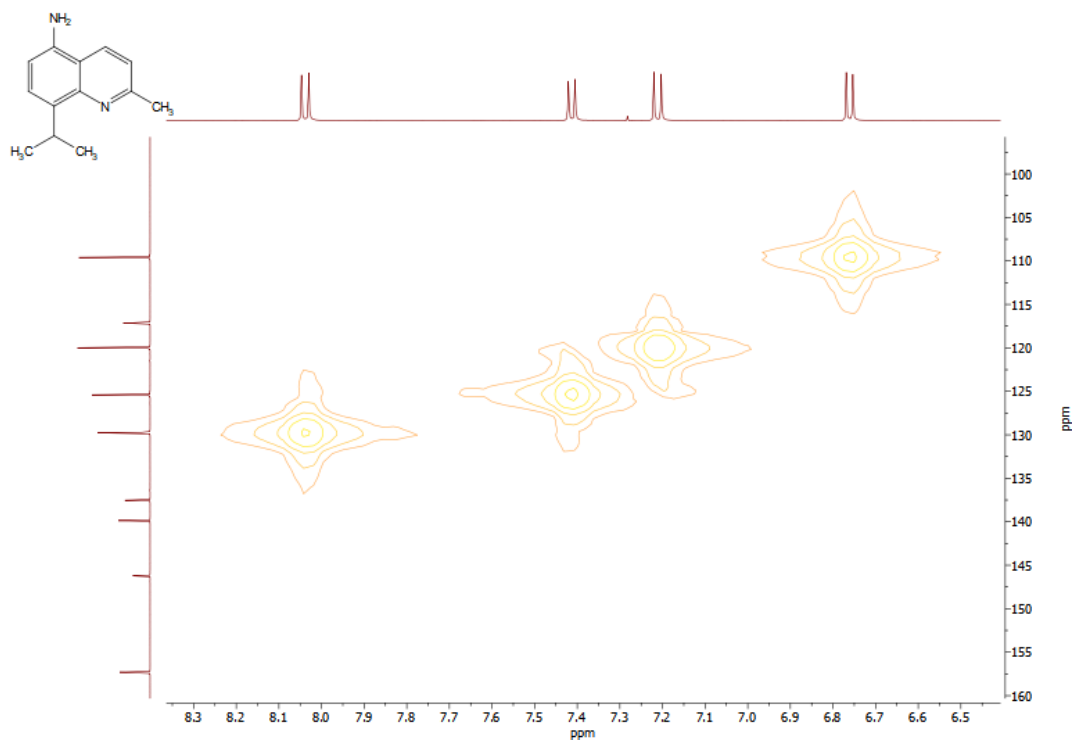

**Fig. S12d.**  $^1\text{H}$  -  $^{13}\text{C}$  HMQC spectrum (aromatic range) of the **6d**.

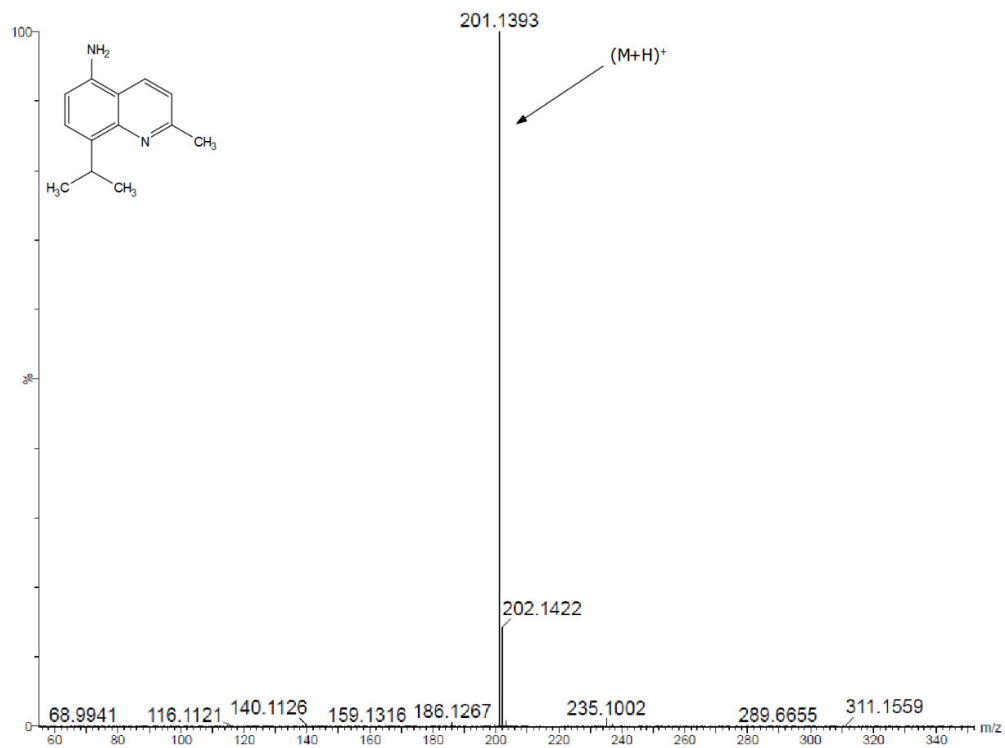

**Fig. S12e.** MS spectrum of the **6d**.
